# Supplementary material for: Sublytic gasdermin-D pores captured in atomistic molecular simulations
Source: eLife. 2022 Nov 14;11:e81432. doi: 10.7554/eLife.81432 (PMC9699695; doi:10.7554/eLife.81432)
Supplement: Figure 1—figure supplement 1—source data 1. [file elife-81432-fig1-figsupp1-data1.xlsx]

## Sheet: Sheet1
	non normalized counts					counts normalized by number of lipids in inner leflet per lipidspecies
Time (µs)	CHOL	PE	PC	PS	PI(4,5)_2	CHOL	PE	PC	PS	PI(4,5)_2
-0.135	16	9	4	7	7	0.0184758	0.0170778	0.0138408	0.0257353	0.0679612
-0.134	35	38	16	27	24	0.0404157	0.0721063	0.0553633	0.0992647	0.23301
-0.133	40	47	24	34	27	0.0461894	0.0891841	0.083045	0.125	0.262136
-0.132	38	50	26	35	25	0.0438799	0.0948767	0.0899654	0.128676	0.242718
-0.131	42	56	30	39	28	0.0484988	0.106262	0.103806	0.143382	0.271845
-0.13	38	33	17	24	13	0.0438799	0.0626186	0.0588235	0.0882353	0.126214
-0.129	36	35	20	27	15	0.0415704	0.0664137	0.0692042	0.0992647	0.145631
-0.128	29	33	18	27	18	0.0334873	0.0626186	0.0622837	0.0992647	0.174757
-0.127	35	39	24	37	21	0.0404157	0.0740038	0.083045	0.136029	0.203883
-0.126	28	34	21	37	20	0.0323326	0.0645161	0.0726644	0.136029	0.194175
-0.125	27	29	24	35	24	0.0311778	0.0550285	0.083045	0.128676	0.23301
-0.124	25	34	25	36	25	0.0288684	0.0645161	0.0865052	0.132353	0.242718
-0.123	24	37	22	39	26	0.0277136	0.0702087	0.0761246	0.143382	0.252427
-0.122	27	34	21	35	26	0.0311778	0.0645161	0.0726644	0.128676	0.252427
-0.121	39	35	19	39	25	0.0450346	0.0664137	0.0657439	0.143382	0.242718
-0.12	25	37	25	38	27	0.0288684	0.0702087	0.0865052	0.139706	0.262136
-0.119	27	36	23	43	26	0.0311778	0.0683112	0.0795848	0.158088	0.252427
-0.118	30	42	28	37	26	0.034642	0.0796964	0.0968858	0.136029	0.252427
-0.117	28	40	28	37	26	0.0323326	0.0759013	0.0968858	0.136029	0.252427
-0.116	31	42	26	42	27	0.0357968	0.0796964	0.0899654	0.154412	0.262136
-0.115	30	39	24	40	26	0.034642	0.0740038	0.083045	0.147059	0.252427
-0.114	24	41	26	38	27	0.0277136	0.0777989	0.0899654	0.139706	0.262136
-0.113	34	43	31	38	27	0.039261	0.0815939	0.107266	0.139706	0.262136
-0.112	36	41	25	39	28	0.0415704	0.0777989	0.0865052	0.143382	0.271845
-0.111	39	39	27	40	27	0.0450346	0.0740038	0.0934256	0.147059	0.262136
-0.11	38	46	22	44	28	0.0438799	0.0872865	0.0761246	0.161765	0.271845
-0.109	36	44	23	41	27	0.0415704	0.0834915	0.0795848	0.150735	0.262136
-0.108	28	45	24	40	30	0.0323326	0.085389	0.083045	0.147059	0.291262
-0.107	32	54	23	41	30	0.0369515	0.102467	0.0795848	0.150735	0.291262
-0.106	32	54	29	40	30	0.0369515	0.102467	0.100346	0.147059	0.291262
-0.105	31	50	22	43	29	0.0357968	0.0948767	0.0761246	0.158088	0.281553
-0.104	30	51	20	43	29	0.034642	0.0967742	0.0692042	0.158088	0.281553
-0.103	29	47	23	40	30	0.0334873	0.0891841	0.0795848	0.147059	0.291262
-0.102	24	46	26	40	29	0.0277136	0.0872865	0.0899654	0.147059	0.281553
-0.101	30	50	24	37	29	0.034642	0.0948767	0.083045	0.136029	0.281553
-0.1	34	47	23	39	27	0.039261	0.0891841	0.0795848	0.143382	0.262136
-0.099	33	51	27	42	28	0.0381062	0.0967742	0.0934256	0.154412	0.271845
-0.098	29	50	25	43	28	0.0334873	0.0948767	0.0865052	0.158088	0.271845
-0.097	26	42	25	46	30	0.0300231	0.0796964	0.0865052	0.169118	0.291262
-0.096	27	50	24	48	30	0.0311778	0.0948767	0.083045	0.176471	0.291262
-0.095	34	52	21	47	28	0.039261	0.0986717	0.0726644	0.172794	0.271845
-0.094	36	50	23	47	28	0.0415704	0.0948767	0.0795848	0.172794	0.271845
-0.093	36	50	18	45	29	0.0415704	0.0948767	0.0622837	0.165441	0.281553
-0.092	37	54	20	47	29	0.0427252	0.102467	0.0692042	0.172794	0.281553
-0.091	40	54	23	50	28	0.0461894	0.102467	0.0795848	0.183824	0.271845
-0.09	39	52	25	46	29	0.0450346	0.0986717	0.0865052	0.169118	0.281553
-0.089	37	44	23	43	27	0.0427252	0.0834915	0.0795848	0.158088	0.262136
-0.088	32	47	23	47	29	0.0369515	0.0891841	0.0795848	0.172794	0.281553
-0.087	33	54	28	45	29	0.0381062	0.102467	0.0968858	0.165441	0.281553
-0.086	31	49	23	44	29	0.0357968	0.0929791	0.0795848	0.161765	0.281553
-0.085	34	50	24	45	28	0.039261	0.0948767	0.083045	0.165441	0.271845
-0.084	29	47	23	42	28	0.0334873	0.0891841	0.0795848	0.154412	0.271845
-0.083	35	47	21	47	29	0.0404157	0.0891841	0.0726644	0.172794	0.281553
-0.082	28	47	24	44	29	0.0323326	0.0891841	0.083045	0.161765	0.281553
-0.081	26	53	23	45	29	0.0300231	0.100569	0.0795848	0.165441	0.281553
-0.08	55	103	54	58	38	0.0635104	0.195446	0.186851	0.213235	0.368932
-0.079	49	96	51	56	36	0.056582	0.182163	0.176471	0.205882	0.349515
-0.078	46	98	49	55	37	0.0531178	0.185958	0.16955	0.202206	0.359223
-0.077	42	97	53	58	39	0.0484988	0.184061	0.183391	0.213235	0.378641
-0.076	35	91	47	54	38	0.0404157	0.172676	0.16263	0.198529	0.368932
-0.075	40	93	45	58	37	0.0461894	0.176471	0.155709	0.213235	0.359223
-0.074	31	86	46	58	37	0.0357968	0.163188	0.15917	0.213235	0.359223
-0.073	39	91	44	59	38	0.0450346	0.172676	0.152249	0.216912	0.368932
-0.072	43	94	44	58	39	0.0496536	0.178368	0.152249	0.213235	0.378641
-0.071	40	89	44	60	38	0.0461894	0.16888	0.152249	0.220588	0.368932
-0.07	43	86	48	59	38	0.0496536	0.163188	0.16609	0.216912	0.368932
-0.069	43	98	49	58	38	0.0496536	0.185958	0.16955	0.213235	0.368932
-0.068	34	96	44	59	39	0.039261	0.182163	0.152249	0.216912	0.378641
-0.067	40	95	45	59	40	0.0461894	0.180266	0.155709	0.216912	0.38835
-0.066	37	91	47	59	41	0.0427252	0.172676	0.16263	0.216912	0.398058
-0.065	35	91	50	58	40	0.0404157	0.172676	0.17301	0.213235	0.38835
-0.064	28	102	50	61	40	0.0323326	0.193548	0.17301	0.224265	0.38835
-0.063	34	95	49	60	40	0.039261	0.180266	0.16955	0.220588	0.38835
-0.062	32	99	49	59	40	0.0369515	0.187856	0.16955	0.216912	0.38835
-0.061	44	83	49	57	41	0.0508083	0.157495	0.16955	0.209559	0.398058
-0.06	44	101	48	59	40	0.0508083	0.191651	0.16609	0.216912	0.38835
-0.059	34	100	49	59	41	0.039261	0.189753	0.16955	0.216912	0.398058
-0.058	34	99	49	58	40	0.039261	0.187856	0.16955	0.213235	0.38835
-0.057	41	94	48	60	42	0.0473441	0.178368	0.16609	0.220588	0.407767
-0.056	38	99	48	60	40	0.0438799	0.187856	0.16609	0.220588	0.38835
-0.055	37	94	52	60	41	0.0427252	0.178368	0.179931	0.220588	0.398058
-0.054	31	102	50	63	41	0.0357968	0.193548	0.17301	0.231618	0.398058
-0.053	41	106	49	61	42	0.0473441	0.201139	0.16955	0.224265	0.407767
-0.052	32	100	47	64	41	0.0369515	0.189753	0.16263	0.235294	0.398058
-0.051	41	94	53	60	41	0.0473441	0.178368	0.183391	0.220588	0.398058
-0.05	35	98	49	59	43	0.0404157	0.185958	0.16955	0.216912	0.417476
-0.049	31	97	52	63	42	0.0357968	0.184061	0.179931	0.231618	0.407767
-0.048	34	97	47	58	43	0.039261	0.184061	0.16263	0.213235	0.417476
-0.047	38	99	47	58	43	0.0438799	0.187856	0.16263	0.213235	0.417476
-0.046	40	94	51	58	42	0.0461894	0.178368	0.176471	0.213235	0.407767
-0.045	42	95	46	58	43	0.0484988	0.180266	0.15917	0.213235	0.417476
-0.044	36	92	40	60	42	0.0415704	0.174573	0.138408	0.220588	0.407767
-0.043	31	104	44	61	42	0.0357968	0.197343	0.152249	0.224265	0.407767
-0.042	38	95	45	59	42	0.0438799	0.180266	0.155709	0.216912	0.407767
-0.041	35	103	36	60	42	0.0404157	0.195446	0.124567	0.220588	0.407767
-0.04	29	95	41	61	42	0.0334873	0.180266	0.141869	0.224265	0.407767
-0.039	43	99	40	63	42	0.0496536	0.187856	0.138408	0.231618	0.407767
-0.038	36	96	43	62	42	0.0415704	0.182163	0.148789	0.227941	0.407767
-0.037	45	107	47	57	42	0.051963	0.203036	0.16263	0.209559	0.407767
-0.036	42	104	50	66	42	0.0484988	0.197343	0.17301	0.242647	0.407767
-0.035	46	98	44	67	42	0.0531178	0.185958	0.152249	0.246324	0.407767
-0.034	37	97	45	67	42	0.0427252	0.184061	0.155709	0.246324	0.407767
-0.033	50	101	43	64	43	0.0577367	0.191651	0.148789	0.235294	0.417476
-0.032	46	93	48	64	43	0.0531178	0.176471	0.16609	0.235294	0.417476
-0.031	45	99	48	64	42	0.051963	0.187856	0.16609	0.235294	0.407767
-0.03	39	99	46	66	43	0.0450346	0.187856	0.15917	0.242647	0.417476
-0.029	37	99	46	69	43	0.0427252	0.187856	0.15917	0.253676	0.417476
-0.028	37	98	47	70	42	0.0427252	0.185958	0.16263	0.257353	0.407767
-0.027	40	89	46	68	41	0.0461894	0.16888	0.15917	0.25	0.398058
-0.026	49	98	49	68	41	0.056582	0.185958	0.16955	0.25	0.398058
-0.025	40	102	48	68	42	0.0461894	0.193548	0.16609	0.25	0.407767
-0.024	38	97	51	66	42	0.0438799	0.184061	0.176471	0.242647	0.407767
-0.023	39	97	48	65	42	0.0450346	0.184061	0.16609	0.238971	0.407767
-0.022	44	92	48	65	44	0.0508083	0.174573	0.16609	0.238971	0.427184
-0.021	38	99	54	67	42	0.0438799	0.187856	0.186851	0.246324	0.407767
-0.02	30	93	48	66	42	0.034642	0.176471	0.16609	0.242647	0.407767
-0.019	31	95	55	63	43	0.0357968	0.180266	0.190311	0.231618	0.417476
-0.018	37	90	49	70	43	0.0427252	0.170778	0.16955	0.257353	0.417476
-0.017	37	101	44	66	42	0.0427252	0.191651	0.152249	0.242647	0.407767
-0.016	49	94	50	65	43	0.056582	0.178368	0.17301	0.238971	0.417476
-0.015	42	94	50	71	43	0.0484988	0.178368	0.17301	0.261029	0.417476
-0.014	36	98	49	68	43	0.0415704	0.185958	0.16955	0.25	0.417476
-0.013	37	102	49	69	43	0.0427252	0.193548	0.16955	0.253676	0.417476
-0.012	36	86	47	65	43	0.0415704	0.163188	0.16263	0.238971	0.417476
-0.011	36	92	48	69	43	0.0415704	0.174573	0.16609	0.253676	0.417476
-0.01	34	89	56	70	43	0.039261	0.16888	0.193772	0.257353	0.417476
-0.009	33	105	47	68	44	0.0381062	0.199241	0.16263	0.25	0.427184
-0.008	40	101	43	65	43	0.0461894	0.191651	0.148789	0.238971	0.417476
-0.007	34	104	45	66	43	0.039261	0.197343	0.155709	0.242647	0.417476
-0.006	36	104	53	68	43	0.0415704	0.197343	0.183391	0.25	0.417476
-0.005	35	99	48	67	43	0.0404157	0.187856	0.16609	0.246324	0.417476
-0.004	40	102	51	69	43	0.0461894	0.193548	0.176471	0.253676	0.417476
-0.003	36	101	45	70	43	0.0415704	0.191651	0.155709	0.257353	0.417476
-0.002	36	99	53	73	43	0.0415704	0.187856	0.183391	0.268382	0.417476
-0.001	38	97	51	71	43	0.0438799	0.184061	0.176471	0.261029	0.417476
0	39	100	52	70	43	0.0450346	0.189753	0.179931	0.257353	0.417476
1	41	117	55	71	44	0.0473441	0.222011	0.190311	0.261029	0.427184
2	43	112	53	73	42	0.0496536	0.212524	0.183391	0.268382	0.407767
3	39	110	49	74	45	0.0450346	0.208729	0.16955	0.272059	0.436893
4	51	114	61	77	45	0.0588915	0.216319	0.211073	0.283088	0.436893
5	53	118	61	76	44	0.0612009	0.223909	0.211073	0.279412	0.427184
6	58	120	60	73	45	0.0669746	0.227704	0.207612	0.268382	0.436893
7	41	130	59	75	45	0.0473441	0.246679	0.204152	0.275735	0.436893
8	53	127	57	71	46	0.0612009	0.240987	0.197232	0.261029	0.446602
9	44	121	60	82	47	0.0508083	0.229602	0.207612	0.301471	0.456311
10	43	116	66	79	48	0.0496536	0.220114	0.228374	0.290441	0.466019
11	58	119	61	81	49	0.0669746	0.225806	0.211073	0.297794	0.475728
12	58	136	57	85	49	0.0669746	0.258065	0.197232	0.3125	0.475728
13	58	128	72	89	49	0.0669746	0.242884	0.249135	0.327206	0.475728
14	58	131	67	83	48	0.0669746	0.248577	0.231834	0.305147	0.466019
15	55	123	68	86	46	0.0635104	0.233397	0.235294	0.316176	0.446602
16	63	131	64	85	48	0.0727483	0.248577	0.221453	0.3125	0.466019
17	59	135	68	83	50	0.0681293	0.256167	0.235294	0.305147	0.485437
18	53	134	64	82	49	0.0612009	0.254269	0.221453	0.301471	0.475728
19	55	122	60	81	47	0.0635104	0.231499	0.207612	0.297794	0.456311
20	60	126	67	81	49	0.0692841	0.239089	0.231834	0.297794	0.475728
21	53	133	62	80	50	0.0612009	0.252372	0.214533	0.294118	0.485437
22	48	130	62	83	49	0.0554273	0.246679	0.214533	0.305147	0.475728
23	50	131	59	83	50	0.0577367	0.248577	0.204152	0.305147	0.485437
24	45	136	64	85	50	0.051963	0.258065	0.221453	0.3125	0.485437
25	55	134	56	82	50	0.0635104	0.254269	0.193772	0.301471	0.485437
26	49	145	71	87	50	0.056582	0.275142	0.245675	0.319853	0.485437
27	52	142	68	87	51	0.0600462	0.26945	0.235294	0.319853	0.495146
28	49	140	68	85	49	0.056582	0.265655	0.235294	0.3125	0.475728
29	60	126	70	86	49	0.0692841	0.239089	0.242215	0.316176	0.475728
30	62	138	70	87	49	0.0715935	0.26186	0.242215	0.319853	0.475728
31	60	134	68	86	49	0.0692841	0.254269	0.235294	0.316176	0.475728
32	56	138	64	84	51	0.0646651	0.26186	0.221453	0.308824	0.495146
33	47	125	73	81	51	0.0542725	0.237192	0.252595	0.297794	0.495146
34	67	130	69	83	51	0.0773672	0.246679	0.238754	0.305147	0.495146
35	57	132	68	83	51	0.0658199	0.250474	0.235294	0.305147	0.495146
36	62	139	70	89	51	0.0715935	0.263757	0.242215	0.327206	0.495146
37	51	135	70	87	52	0.0588915	0.256167	0.242215	0.319853	0.504854
38	54	143	65	93	52	0.0623557	0.271347	0.224913	0.341912	0.504854
39	54	137	67	90	52	0.0623557	0.259962	0.231834	0.330882	0.504854
40	57	144	66	89	51	0.0658199	0.273245	0.228374	0.327206	0.495146
41	67	145	63	86	51	0.0773672	0.275142	0.217993	0.316176	0.495146
42	58	137	68	89	52	0.0669746	0.259962	0.235294	0.327206	0.504854
43	62	138	66	93	52	0.0715935	0.26186	0.228374	0.341912	0.504854
44	58	141	65	89	52	0.0669746	0.267552	0.224913	0.327206	0.504854
45	62	141	70	87	51	0.0715935	0.267552	0.242215	0.319853	0.495146
46	61	143	60	84	52	0.0704388	0.271347	0.207612	0.308824	0.504854
47	63	146	74	89	52	0.0727483	0.27704	0.256055	0.327206	0.504854
48	61	132	71	91	52	0.0704388	0.250474	0.245675	0.334559	0.504854
49	61	138	72	90	52	0.0704388	0.26186	0.249135	0.330882	0.504854
50	55	134	77	91	51	0.0635104	0.254269	0.266436	0.334559	0.495146
51	58	140	72	91	51	0.0669746	0.265655	0.249135	0.334559	0.495146
52	59	140	68	92	52	0.0681293	0.265655	0.235294	0.338235	0.504854
53	60	142	62	91	53	0.0692841	0.26945	0.214533	0.334559	0.514563
54	67	130	64	90	52	0.0773672	0.246679	0.221453	0.330882	0.504854
55	63	130	71	91	53	0.0727483	0.246679	0.245675	0.334559	0.514563
56	63	131	69	90	52	0.0727483	0.248577	0.238754	0.330882	0.504854
57	58	140	66	94	52	0.0669746	0.265655	0.228374	0.345588	0.504854
58	62	136	68	97	53	0.0715935	0.258065	0.235294	0.356618	0.514563
59	61	133	64	97	53	0.0704388	0.252372	0.221453	0.356618	0.514563
60	55	133	62	93	52	0.0635104	0.252372	0.214533	0.341912	0.504854
61	59	132	68	90	54	0.0681293	0.250474	0.235294	0.330882	0.524272
62	61	139	71	96	53	0.0704388	0.263757	0.245675	0.352941	0.514563
63	46	146	69	98	54	0.0531178	0.27704	0.238754	0.360294	0.524272
64	53	135	74	99	53	0.0612009	0.256167	0.256055	0.363971	0.514563
65	46	131	68	96	52	0.0531178	0.248577	0.235294	0.352941	0.504854
66	48	135	69	96	53	0.0554273	0.256167	0.238754	0.352941	0.514563
67	63	128	71	89	53	0.0727483	0.242884	0.245675	0.327206	0.514563
68	49	124	74	89	53	0.056582	0.235294	0.256055	0.327206	0.514563
69	59	136	65	87	52	0.0681293	0.258065	0.224913	0.319853	0.504854
70	59	133	73	88	53	0.0681293	0.252372	0.252595	0.323529	0.514563
71	65	127	69	91	51	0.0750577	0.240987	0.238754	0.334559	0.495146
72	59	130	74	91	51	0.0681293	0.246679	0.256055	0.334559	0.495146
73	53	132	69	92	52	0.0612009	0.250474	0.238754	0.338235	0.504854
74	59	140	71	87	52	0.0681293	0.265655	0.245675	0.319853	0.504854
75	60	137	70	87	52	0.0692841	0.259962	0.242215	0.319853	0.504854
76	58	128	68	92	52	0.0669746	0.242884	0.235294	0.338235	0.504854
77	59	139	66	89	54	0.0681293	0.263757	0.228374	0.327206	0.524272
78	63	136	70	90	51	0.0727483	0.258065	0.242215	0.330882	0.495146
79	49	143	74	88	53	0.056582	0.271347	0.256055	0.323529	0.514563
80	54	143	76	91	53	0.0623557	0.271347	0.262976	0.334559	0.514563
81	55	140	69	86	54	0.0635104	0.265655	0.238754	0.316176	0.524272
82	54	143	64	89	54	0.0623557	0.271347	0.221453	0.327206	0.524272
83	57	133	68	93	54	0.0658199	0.252372	0.235294	0.341912	0.524272
84	61	141	72	90	54	0.0704388	0.267552	0.249135	0.330882	0.524272
85	62	132	75	86	54	0.0715935	0.250474	0.259516	0.316176	0.524272
86	59	128	67	90	54	0.0681293	0.242884	0.231834	0.330882	0.524272
87	53	140	72	91	52	0.0612009	0.265655	0.249135	0.334559	0.504854
88	59	133	72	90	51	0.0681293	0.252372	0.249135	0.330882	0.495146
89	59	136	69	90	52	0.0681293	0.258065	0.238754	0.330882	0.504854
90	61	144	74	86	53	0.0704388	0.273245	0.256055	0.316176	0.514563
91	54	137	66	92	53	0.0623557	0.259962	0.228374	0.338235	0.514563
92	56	133	73	91	53	0.0646651	0.252372	0.252595	0.334559	0.514563
93	59	134	70	92	54	0.0681293	0.254269	0.242215	0.338235	0.524272
94	73	126	76	88	52	0.0842956	0.239089	0.262976	0.323529	0.504854
95	54	128	69	92	53	0.0623557	0.242884	0.238754	0.338235	0.514563
96	58	139	69	89	54	0.0669746	0.263757	0.238754	0.327206	0.524272
97	60	143	70	87	55	0.0692841	0.271347	0.242215	0.319853	0.533981
98	54	138	75	86	54	0.0623557	0.26186	0.259516	0.316176	0.524272
99	57	139	74	89	56	0.0658199	0.263757	0.256055	0.327206	0.543689
100	53	137	75	84	57	0.0612009	0.259962	0.259516	0.308824	0.553398
101	56	140	71	88	56	0.0646651	0.265655	0.245675	0.323529	0.543689
102	62	152	71	87	56	0.0715935	0.288425	0.245675	0.319853	0.543689
103	58	139	66	89	56	0.0669746	0.263757	0.228374	0.327206	0.543689
104	56	131	71	89	57	0.0646651	0.248577	0.245675	0.327206	0.553398
105	56	133	69	92	57	0.0646651	0.252372	0.238754	0.338235	0.553398
106	65	138	69	93	57	0.0750577	0.26186	0.238754	0.341912	0.553398
107	60	138	72	90	56	0.0692841	0.26186	0.249135	0.330882	0.543689
108	55	138	71	89	56	0.0635104	0.26186	0.245675	0.327206	0.543689
109	59	137	67	90	57	0.0681293	0.259962	0.231834	0.330882	0.553398
110	55	128	79	92	57	0.0635104	0.242884	0.273356	0.338235	0.553398
111	59	120	72	92	57	0.0681293	0.227704	0.249135	0.338235	0.553398
112	62	136	73	91	58	0.0715935	0.258065	0.252595	0.334559	0.563107
113	59	138	75	93	58	0.0681293	0.26186	0.259516	0.341912	0.563107
114	61	138	62	91	58	0.0704388	0.26186	0.214533	0.334559	0.563107
115	50	137	70	95	58	0.0577367	0.259962	0.242215	0.349265	0.563107
116	55	127	71	90	58	0.0635104	0.240987	0.245675	0.330882	0.563107
117	58	137	73	88	59	0.0669746	0.259962	0.252595	0.323529	0.572816
118	53	138	69	96	59	0.0612009	0.26186	0.238754	0.352941	0.572816
119	56	134	76	85	59	0.0646651	0.254269	0.262976	0.3125	0.572816
120	53	137	61	88	58	0.0612009	0.259962	0.211073	0.323529	0.563107
121	52	133	71	96	58	0.0600462	0.252372	0.245675	0.352941	0.563107
122	51	133	75	90	59	0.0588915	0.252372	0.259516	0.330882	0.572816
123	54	130	68	89	59	0.0623557	0.246679	0.235294	0.327206	0.572816
124	58	131	68	91	59	0.0669746	0.248577	0.235294	0.334559	0.572816
125	57	139	73	89	58	0.0658199	0.263757	0.252595	0.327206	0.563107
126	50	136	71	93	56	0.0577367	0.258065	0.245675	0.341912	0.543689
127	55	136	66	92	57	0.0635104	0.258065	0.228374	0.338235	0.553398
128	54	139	67	91	57	0.0623557	0.263757	0.231834	0.334559	0.553398
129	52	137	73	94	57	0.0600462	0.259962	0.252595	0.345588	0.553398
130	50	140	72	90	58	0.0577367	0.265655	0.249135	0.330882	0.563107
131	54	133	72	92	58	0.0623557	0.252372	0.249135	0.338235	0.563107
132	57	129	70	90	57	0.0658199	0.244782	0.242215	0.330882	0.553398
133	54	141	69	87	60	0.0623557	0.267552	0.238754	0.319853	0.582524
134	59	139	77	89	60	0.0681293	0.263757	0.266436	0.327206	0.582524
135	68	139	70	94	59	0.0785219	0.263757	0.242215	0.345588	0.572816
136	59	142	69	94	60	0.0681293	0.26945	0.238754	0.345588	0.582524
137	58	136	74	95	60	0.0669746	0.258065	0.256055	0.349265	0.582524
138	59	139	67	91	59	0.0681293	0.263757	0.231834	0.334559	0.572816
139	63	137	75	96	57	0.0727483	0.259962	0.259516	0.352941	0.553398
140	64	124	65	99	57	0.073903	0.235294	0.224913	0.363971	0.553398
141	55	134	73	93	58	0.0635104	0.254269	0.252595	0.341912	0.563107
142	55	128	68	94	58	0.0635104	0.242884	0.235294	0.345588	0.563107
143	63	138	71	94	58	0.0727483	0.26186	0.245675	0.345588	0.563107
144	58	133	72	95	57	0.0669746	0.252372	0.249135	0.349265	0.553398
145	59	137	72	93	58	0.0681293	0.259962	0.249135	0.341912	0.563107
146	60	131	65	93	58	0.0692841	0.248577	0.224913	0.341912	0.563107
147	71	144	70	95	57	0.0819861	0.273245	0.242215	0.349265	0.553398
148	61	132	61	98	59	0.0704388	0.250474	0.211073	0.360294	0.572816
149	60	138	65	96	57	0.0692841	0.26186	0.224913	0.352941	0.553398
150	62	142	71	94	58	0.0715935	0.26945	0.245675	0.345588	0.563107
151	60	138	66	93	59	0.0692841	0.26186	0.228374	0.341912	0.572816
152	63	135	69	97	58	0.0727483	0.256167	0.238754	0.356618	0.563107
153	59	137	70	93	58	0.0681293	0.259962	0.242215	0.341912	0.563107
154	57	142	71	90	58	0.0658199	0.26945	0.245675	0.330882	0.563107
155	51	138	70	92	59	0.0588915	0.26186	0.242215	0.338235	0.572816
156	53	134	71	91	57	0.0612009	0.254269	0.245675	0.334559	0.553398
157	54	135	70	85	58	0.0623557	0.256167	0.242215	0.3125	0.563107
158	55	137	64	86	58	0.0635104	0.259962	0.221453	0.316176	0.563107
159	61	138	67	88	57	0.0704388	0.26186	0.231834	0.323529	0.553398
160	55	135	74	86	58	0.0635104	0.256167	0.256055	0.316176	0.563107
161	66	144	77	90	59	0.0762125	0.273245	0.266436	0.330882	0.572816
162	62	137	72	89	58	0.0715935	0.259962	0.249135	0.327206	0.563107
163	50	138	66	92	58	0.0577367	0.26186	0.228374	0.338235	0.563107
164	61	137	71	90	58	0.0704388	0.259962	0.245675	0.330882	0.563107
165	59	130	71	91	58	0.0681293	0.246679	0.245675	0.334559	0.563107
166	51	139	75	92	57	0.0588915	0.263757	0.259516	0.338235	0.553398
167	49	142	67	90	57	0.056582	0.26945	0.231834	0.330882	0.553398
168	48	140	67	97	56	0.0554273	0.265655	0.231834	0.356618	0.543689
169	53	132	66	94	56	0.0612009	0.250474	0.228374	0.345588	0.543689
170	50	149	72	96	55	0.0577367	0.282732	0.249135	0.352941	0.533981
171	57	140	64	98	56	0.0658199	0.265655	0.221453	0.360294	0.543689
172	57	141	68	93	56	0.0658199	0.267552	0.235294	0.341912	0.543689
173	62	131	63	95	56	0.0715935	0.248577	0.217993	0.349265	0.543689
174	60	132	61	93	56	0.0692841	0.250474	0.211073	0.341912	0.543689
175	58	145	61	87	56	0.0669746	0.275142	0.211073	0.319853	0.543689
176	57	143	62	90	56	0.0658199	0.271347	0.214533	0.330882	0.543689
177	63	136	70	96	58	0.0727483	0.258065	0.242215	0.352941	0.563107
178	63	141	69	90	56	0.0727483	0.267552	0.238754	0.330882	0.543689
179	63	128	73	92	56	0.0727483	0.242884	0.252595	0.338235	0.543689
180	54	135	63	97	56	0.0623557	0.256167	0.217993	0.356618	0.543689
181	65	138	74	90	56	0.0750577	0.26186	0.256055	0.330882	0.543689
182	60	139	74	95	57	0.0692841	0.263757	0.256055	0.349265	0.553398
183	63	129	72	98	57	0.0727483	0.244782	0.249135	0.360294	0.553398
184	56	140	65	93	57	0.0646651	0.265655	0.224913	0.341912	0.553398
185	64	143	67	89	58	0.073903	0.271347	0.231834	0.327206	0.563107
186	55	139	65	94	59	0.0635104	0.263757	0.224913	0.345588	0.572816
187	51	143	69	88	59	0.0588915	0.271347	0.238754	0.323529	0.572816
188	61	138	79	94	58	0.0704388	0.26186	0.273356	0.345588	0.563107
189	58	141	70	101	59	0.0669746	0.267552	0.242215	0.371324	0.572816
190	51	145	72	94	59	0.0588915	0.275142	0.249135	0.345588	0.572816
191	54	140	76	96	59	0.0623557	0.265655	0.262976	0.352941	0.572816
192	61	136	72	96	58	0.0704388	0.258065	0.249135	0.352941	0.563107
193	60	134	67	89	58	0.0692841	0.254269	0.231834	0.327206	0.563107
194	59	134	70	95	59	0.0681293	0.254269	0.242215	0.349265	0.572816
195	61	141	66	92	58	0.0704388	0.267552	0.228374	0.338235	0.563107
196	67	145	70	93	58	0.0773672	0.275142	0.242215	0.341912	0.563107
197	64	135	76	96	57	0.073903	0.256167	0.262976	0.352941	0.553398
198	60	147	70	95	58	0.0692841	0.278937	0.242215	0.349265	0.563107
199	61	150	79	88	59	0.0704388	0.28463	0.273356	0.323529	0.572816
200	62	133	68	94	59	0.0715935	0.252372	0.235294	0.345588	0.572816
201	63	138	67	92	59	0.0727483	0.26186	0.231834	0.338235	0.572816
202	59	143	70	94	59	0.0681293	0.271347	0.242215	0.345588	0.572816
203	62	137	67	93	59	0.0715935	0.259962	0.231834	0.341912	0.572816
204	58	144	74	93	59	0.0669746	0.273245	0.256055	0.341912	0.572816
205	59	148	76	93	57	0.0681293	0.280835	0.262976	0.341912	0.553398
206	61	139	74	95	59	0.0704388	0.263757	0.256055	0.349265	0.572816
207	65	138	70	96	60	0.0750577	0.26186	0.242215	0.352941	0.582524
208	70	141	71	92	59	0.0808314	0.267552	0.245675	0.338235	0.572816
209	70	138	67	89	59	0.0808314	0.26186	0.231834	0.327206	0.572816
210	62	139	71	93	59	0.0715935	0.263757	0.245675	0.341912	0.572816
211	68	135	68	96	60	0.0785219	0.256167	0.235294	0.352941	0.582524
212	67	138	70	92	61	0.0773672	0.26186	0.242215	0.338235	0.592233
213	62	146	72	97	60	0.0715935	0.27704	0.249135	0.356618	0.582524
214	59	144	69	93	60	0.0681293	0.273245	0.238754	0.341912	0.582524
215	60	137	74	95	62	0.0692841	0.259962	0.256055	0.349265	0.601942
216	68	138	69	98	61	0.0785219	0.26186	0.238754	0.360294	0.592233
217	63	140	69	98	60	0.0727483	0.265655	0.238754	0.360294	0.582524
218	53	134	67	98	61	0.0612009	0.254269	0.231834	0.360294	0.592233
219	54	131	69	97	61	0.0623557	0.248577	0.238754	0.356618	0.592233
220	55	143	61	95	60	0.0635104	0.271347	0.211073	0.349265	0.582524
221	61	132	74	98	60	0.0704388	0.250474	0.256055	0.360294	0.582524
222	60	134	71	99	60	0.0692841	0.254269	0.245675	0.363971	0.582524
223	62	144	64	97	61	0.0715935	0.273245	0.221453	0.356618	0.592233
224	63	134	74	99	60	0.0727483	0.254269	0.256055	0.363971	0.582524
225	67	141	76	99	60	0.0773672	0.267552	0.262976	0.363971	0.582524
226	61	135	71	100	60	0.0704388	0.256167	0.245675	0.367647	0.582524
227	69	128	64	97	60	0.0796767	0.242884	0.221453	0.356618	0.582524
228	56	130	65	95	59	0.0646651	0.246679	0.224913	0.349265	0.572816
229	59	135	77	99	59	0.0681293	0.256167	0.266436	0.363971	0.572816
230	59	132	68	97	60	0.0681293	0.250474	0.235294	0.356618	0.582524
231	55	139	72	94	60	0.0635104	0.263757	0.249135	0.345588	0.582524
232	56	126	74	99	61	0.0646651	0.239089	0.256055	0.363971	0.592233
233	62	134	64	92	61	0.0715935	0.254269	0.221453	0.338235	0.592233
234	60	139	68	102	61	0.0692841	0.263757	0.235294	0.375	0.592233
235	63	142	75	98	62	0.0727483	0.26945	0.259516	0.360294	0.601942
236	62	131	72	98	60	0.0715935	0.248577	0.249135	0.360294	0.582524
237	67	139	66	97	61	0.0773672	0.263757	0.228374	0.356618	0.592233
238	69	134	71	94	61	0.0796767	0.254269	0.245675	0.345588	0.592233
239	60	128	77	94	60	0.0692841	0.242884	0.266436	0.345588	0.582524
240	60	140	67	95	60	0.0692841	0.265655	0.231834	0.349265	0.582524
241	63	139	69	106	60	0.0727483	0.263757	0.238754	0.389706	0.582524
242	73	143	65	96	60	0.0842956	0.271347	0.224913	0.352941	0.582524
243	68	141	68	99	61	0.0785219	0.267552	0.235294	0.363971	0.592233
244	75	143	63	103	62	0.0866051	0.271347	0.217993	0.378676	0.601942
245	75	131	69	99	63	0.0866051	0.248577	0.238754	0.363971	0.61165
246	68	144	69	104	63	0.0785219	0.273245	0.238754	0.382353	0.61165
247	69	129	67	104	63	0.0796767	0.244782	0.231834	0.382353	0.61165
248	59	140	73	105	63	0.0681293	0.265655	0.252595	0.386029	0.61165
249	68	132	65	104	63	0.0785219	0.250474	0.224913	0.382353	0.61165
250	57	141	64	99	62	0.0658199	0.267552	0.221453	0.363971	0.601942
251	60	145	64	99	61	0.0692841	0.275142	0.221453	0.363971	0.592233
252	52	138	67	102	61	0.0600462	0.26186	0.231834	0.375	0.592233
253	62	141	66	97	61	0.0715935	0.267552	0.228374	0.356618	0.592233
254	62	128	72	102	62	0.0715935	0.242884	0.249135	0.375	0.601942
255	58	133	69	99	63	0.0669746	0.252372	0.238754	0.363971	0.61165
256	61	127	73	95	63	0.0704388	0.240987	0.252595	0.349265	0.61165
257	67	127	71	97	62	0.0773672	0.240987	0.245675	0.356618	0.601942
258	58	135	71	96	64	0.0669746	0.256167	0.245675	0.352941	0.621359
259	66	128	66	95	62	0.0762125	0.242884	0.228374	0.349265	0.601942
260	63	136	66	94	63	0.0727483	0.258065	0.228374	0.345588	0.61165
261	61	119	65	99	63	0.0704388	0.225806	0.224913	0.363971	0.61165
262	75	135	76	95	64	0.0866051	0.256167	0.262976	0.349265	0.621359
263	67	135	70	100	62	0.0773672	0.256167	0.242215	0.367647	0.601942
264	65	136	71	93	62	0.0750577	0.258065	0.245675	0.341912	0.601942
265	69	134	70	106	63	0.0796767	0.254269	0.242215	0.389706	0.61165
266	65	131	79	102	64	0.0750577	0.248577	0.273356	0.375	0.621359
267	68	129	67	98	63	0.0785219	0.244782	0.231834	0.360294	0.61165
268	68	140	77	98	64	0.0785219	0.265655	0.266436	0.360294	0.621359
269	67	144	69	100	63	0.0773672	0.273245	0.238754	0.367647	0.61165
270	77	138	79	97	63	0.0889145	0.26186	0.273356	0.356618	0.61165
271	76	138	71	99	63	0.0877598	0.26186	0.245675	0.363971	0.61165
272	77	135	71	98	64	0.0889145	0.256167	0.245675	0.360294	0.621359
273	67	137	70	96	64	0.0773672	0.259962	0.242215	0.352941	0.621359
274	74	130	73	101	64	0.0854503	0.246679	0.252595	0.371324	0.621359
275	68	139	75	96	64	0.0785219	0.263757	0.259516	0.352941	0.621359
276	75	141	76	100	63	0.0866051	0.267552	0.262976	0.367647	0.61165
277	73	132	75	100	64	0.0842956	0.250474	0.259516	0.367647	0.621359
278	68	139	72	103	64	0.0785219	0.263757	0.249135	0.378676	0.621359
279	70	137	71	99	63	0.0808314	0.259962	0.245675	0.363971	0.61165
280	69	139	78	102	63	0.0796767	0.263757	0.269896	0.375	0.61165
281	77	141	74	96	63	0.0889145	0.267552	0.256055	0.352941	0.61165
282	77	131	73	96	63	0.0889145	0.248577	0.252595	0.352941	0.61165
283	71	135	72	95	63	0.0819861	0.256167	0.249135	0.349265	0.61165
284	72	134	74	100	63	0.0831409	0.254269	0.256055	0.367647	0.61165
285	68	135	78	95	62	0.0785219	0.256167	0.269896	0.349265	0.601942
286	73	146	69	93	63	0.0842956	0.27704	0.238754	0.341912	0.61165
287	70	140	73	98	63	0.0808314	0.265655	0.252595	0.360294	0.61165
288	73	136	72	92	63	0.0842956	0.258065	0.249135	0.338235	0.61165
289	79	148	76	98	62	0.091224	0.280835	0.262976	0.360294	0.601942
290	79	140	74	100	64	0.091224	0.265655	0.256055	0.367647	0.621359
291	77	146	69	97	64	0.0889145	0.27704	0.238754	0.356618	0.621359
292	72	141	76	97	63	0.0831409	0.267552	0.262976	0.356618	0.61165
293	67	139	69	97	63	0.0773672	0.263757	0.238754	0.356618	0.61165
294	70	140	73	99	62	0.0808314	0.265655	0.252595	0.363971	0.601942
295	76	140	78	99	63	0.0877598	0.265655	0.269896	0.363971	0.61165
296	71	142	77	98	64	0.0819861	0.26945	0.266436	0.360294	0.621359
297	74	146	69	100	63	0.0854503	0.27704	0.238754	0.367647	0.61165
298	72	140	74	94	62	0.0831409	0.265655	0.256055	0.345588	0.601942
299	70	142	75	94	62	0.0808314	0.26945	0.259516	0.345588	0.601942
300	67	148	72	96	62	0.0773672	0.280835	0.249135	0.352941	0.601942
301	74	135	68	91	62	0.0854503	0.256167	0.235294	0.334559	0.601942
302	67	136	67	95	63	0.0773672	0.258065	0.231834	0.349265	0.61165
303	74	148	74	99	62	0.0854503	0.280835	0.256055	0.363971	0.601942
304	77	142	73	93	62	0.0889145	0.26945	0.252595	0.341912	0.601942
305	63	145	72	92	63	0.0727483	0.275142	0.249135	0.338235	0.61165
306	76	138	66	95	63	0.0877598	0.26186	0.228374	0.349265	0.61165
307	66	143	67	89	63	0.0762125	0.271347	0.231834	0.327206	0.61165
308	67	147	70	91	63	0.0773672	0.278937	0.242215	0.334559	0.61165
309	69	140	71	98	63	0.0796767	0.265655	0.245675	0.360294	0.61165
310	67	149	76	95	63	0.0773672	0.282732	0.262976	0.349265	0.61165
311	71	140	71	103	63	0.0819861	0.265655	0.245675	0.378676	0.61165
312	65	138	71	102	63	0.0750577	0.26186	0.245675	0.375	0.61165
313	64	139	71	100	64	0.073903	0.263757	0.245675	0.367647	0.621359
314	62	142	69	98	64	0.0715935	0.26945	0.238754	0.360294	0.621359
315	63	143	73	99	63	0.0727483	0.271347	0.252595	0.363971	0.61165
316	63	148	67	101	64	0.0727483	0.280835	0.231834	0.371324	0.621359
317	65	150	67	100	63	0.0750577	0.28463	0.231834	0.367647	0.61165
318	74	147	73	105	63	0.0854503	0.278937	0.252595	0.386029	0.61165
319	65	149	68	100	62	0.0750577	0.282732	0.235294	0.367647	0.601942
320	66	143	63	103	65	0.0762125	0.271347	0.217993	0.378676	0.631068
321	72	136	64	98	63	0.0831409	0.258065	0.221453	0.360294	0.61165
322	66	145	68	100	63	0.0762125	0.275142	0.235294	0.367647	0.61165
323	61	142	71	103	63	0.0704388	0.26945	0.245675	0.378676	0.61165
324	64	139	71	102	63	0.073903	0.263757	0.245675	0.375	0.61165
325	67	132	65	97	63	0.0773672	0.250474	0.224913	0.356618	0.61165
326	63	148	65	97	63	0.0727483	0.280835	0.224913	0.356618	0.61165
327	67	146	68	102	62	0.0773672	0.27704	0.235294	0.375	0.601942
328	67	144	67	104	63	0.0773672	0.273245	0.231834	0.382353	0.61165
329	78	148	68	105	63	0.0900693	0.280835	0.235294	0.386029	0.61165
330	66	151	66	104	63	0.0762125	0.286528	0.228374	0.382353	0.61165
331	68	145	67	102	63	0.0785219	0.275142	0.231834	0.375	0.61165
332	70	154	67	103	62	0.0808314	0.29222	0.231834	0.378676	0.601942
333	63	146	71	102	62	0.0727483	0.27704	0.245675	0.375	0.601942
334	64	141	81	106	62	0.073903	0.267552	0.280277	0.389706	0.601942
335	61	150	72	99	62	0.0704388	0.28463	0.249135	0.363971	0.601942
336	62	135	66	103	62	0.0715935	0.256167	0.228374	0.378676	0.601942
337	64	139	76	103	62	0.073903	0.263757	0.262976	0.378676	0.601942
338	70	143	75	101	62	0.0808314	0.271347	0.259516	0.371324	0.601942
339	71	144	72	99	64	0.0819861	0.273245	0.249135	0.363971	0.621359
340	64	133	69	101	62	0.073903	0.252372	0.238754	0.371324	0.601942
341	64	139	71	98	62	0.073903	0.263757	0.245675	0.360294	0.601942
342	69	139	70	99	64	0.0796767	0.263757	0.242215	0.363971	0.621359
343	63	140	73	102	63	0.0727483	0.265655	0.252595	0.375	0.61165
344	65	139	69	96	63	0.0750577	0.263757	0.238754	0.352941	0.61165
345	69	139	67	96	63	0.0796767	0.263757	0.231834	0.352941	0.61165
346	69	144	63	99	62	0.0796767	0.273245	0.217993	0.363971	0.601942
347	66	142	65	95	61	0.0762125	0.26945	0.224913	0.349265	0.592233
348	70	150	66	98	62	0.0808314	0.28463	0.228374	0.360294	0.601942
349	62	147	61	99	63	0.0715935	0.278937	0.211073	0.363971	0.61165
350	64	132	72	97	63	0.073903	0.250474	0.249135	0.356618	0.61165
351	57	135	68	99	63	0.0658199	0.256167	0.235294	0.363971	0.61165
352	70	143	64	104	62	0.0808314	0.271347	0.221453	0.382353	0.601942
353	69	141	66	100	62	0.0796767	0.267552	0.228374	0.367647	0.601942
354	68	145	72	102	63	0.0785219	0.275142	0.249135	0.375	0.61165
355	66	145	69	99	64	0.0762125	0.275142	0.238754	0.363971	0.621359
356	69	139	69	99	65	0.0796767	0.263757	0.238754	0.363971	0.631068
357	65	146	75	103	64	0.0750577	0.27704	0.259516	0.378676	0.621359
358	68	138	69	100	64	0.0785219	0.26186	0.238754	0.367647	0.621359
359	65	142	68	99	64	0.0750577	0.26945	0.235294	0.363971	0.621359
360	61	139	67	103	61	0.0704388	0.263757	0.231834	0.378676	0.592233
361	63	148	69	102	63	0.0727483	0.280835	0.238754	0.375	0.61165
362	57	140	76	100	63	0.0658199	0.265655	0.262976	0.367647	0.61165
363	65	143	71	102	65	0.0750577	0.271347	0.245675	0.375	0.631068
364	68	139	69	100	63	0.0785219	0.263757	0.238754	0.367647	0.61165
365	63	147	72	105	63	0.0727483	0.278937	0.249135	0.386029	0.61165
366	75	145	69	102	63	0.0866051	0.275142	0.238754	0.375	0.61165
367	75	144	67	100	62	0.0866051	0.273245	0.231834	0.367647	0.601942
368	69	141	63	101	61	0.0796767	0.267552	0.217993	0.371324	0.592233
369	69	153	68	103	63	0.0796767	0.290323	0.235294	0.378676	0.61165
370	65	148	70	93	61	0.0750577	0.280835	0.242215	0.341912	0.592233
371	70	141	67	97	63	0.0808314	0.267552	0.231834	0.356618	0.61165
372	72	140	64	95	61	0.0831409	0.265655	0.221453	0.349265	0.592233
373	67	144	64	96	62	0.0773672	0.273245	0.221453	0.352941	0.601942
374	62	139	69	93	63	0.0715935	0.263757	0.238754	0.341912	0.61165
375	65	141	63	95	64	0.0750577	0.267552	0.217993	0.349265	0.621359
376	64	146	63	93	63	0.073903	0.27704	0.217993	0.341912	0.61165
377	67	136	65	95	63	0.0773672	0.258065	0.224913	0.349265	0.61165
378	62	146	71	94	64	0.0715935	0.27704	0.245675	0.345588	0.621359
379	64	143	71	94	64	0.073903	0.271347	0.245675	0.345588	0.621359
380	65	144	66	95	63	0.0750577	0.273245	0.228374	0.349265	0.61165
381	61	136	73	93	63	0.0704388	0.258065	0.252595	0.341912	0.61165
382	65	145	69	100	63	0.0750577	0.275142	0.238754	0.367647	0.61165
383	64	148	69	99	63	0.073903	0.280835	0.238754	0.363971	0.61165
384	69	143	69	102	64	0.0796767	0.271347	0.238754	0.375	0.621359
385	65	154	74	98	63	0.0750577	0.29222	0.256055	0.360294	0.61165
386	61	145	71	95	63	0.0704388	0.275142	0.245675	0.349265	0.61165
387	72	156	75	99	63	0.0831409	0.296015	0.259516	0.363971	0.61165
388	74	150	76	98	63	0.0854503	0.28463	0.262976	0.360294	0.61165
389	63	145	70	101	63	0.0727483	0.275142	0.242215	0.371324	0.61165
390	64	148	78	94	64	0.073903	0.280835	0.269896	0.345588	0.621359
391	74	147	74	96	64	0.0854503	0.278937	0.256055	0.352941	0.621359
392	70	148	73	100	63	0.0808314	0.280835	0.252595	0.367647	0.61165
393	74	144	74	99	64	0.0854503	0.273245	0.256055	0.363971	0.621359
394	71	143	66	93	63	0.0819861	0.271347	0.228374	0.341912	0.61165
395	68	153	73	100	63	0.0785219	0.290323	0.252595	0.367647	0.61165
396	67	143	76	99	64	0.0773672	0.271347	0.262976	0.363971	0.621359
397	70	147	71	98	62	0.0808314	0.278937	0.245675	0.360294	0.601942
398	65	144	74	95	62	0.0750577	0.273245	0.256055	0.349265	0.601942
399	67	146	70	90	62	0.0773672	0.27704	0.242215	0.330882	0.601942
400	70	146	75	97	63	0.0808314	0.27704	0.259516	0.356618	0.61165
401	69	147	66	94	62	0.0796767	0.278937	0.228374	0.345588	0.601942
402	64	151	68	95	63	0.073903	0.286528	0.235294	0.349265	0.61165
403	72	158	74	95	64	0.0831409	0.29981	0.256055	0.349265	0.621359
404	62	150	72	95	62	0.0715935	0.28463	0.249135	0.349265	0.601942
405	64	148	69	94	62	0.073903	0.280835	0.238754	0.345588	0.601942
406	69	150	70	98	62	0.0796767	0.28463	0.242215	0.360294	0.601942
407	67	154	70	91	63	0.0773672	0.29222	0.242215	0.334559	0.61165
408	67	147	69	94	65	0.0773672	0.278937	0.238754	0.345588	0.631068
409	74	149	66	92	63	0.0854503	0.282732	0.228374	0.338235	0.61165
410	82	143	62	98	63	0.0946882	0.271347	0.214533	0.360294	0.61165
411	74	157	67	92	63	0.0854503	0.297913	0.231834	0.338235	0.61165
412	77	154	68	89	65	0.0889145	0.29222	0.235294	0.327206	0.631068
413	79	155	70	93	64	0.091224	0.294118	0.242215	0.341912	0.621359
414	71	154	69	94	65	0.0819861	0.29222	0.238754	0.345588	0.631068
415	80	148	71	91	65	0.0923788	0.280835	0.245675	0.334559	0.631068
416	73	153	68	98	64	0.0842956	0.290323	0.235294	0.360294	0.621359
417	72	157	72	95	66	0.0831409	0.297913	0.249135	0.349265	0.640777
418	73	152	73	89	64	0.0842956	0.288425	0.252595	0.327206	0.621359
419	64	153	67	94	66	0.073903	0.290323	0.231834	0.345588	0.640777
420	66	154	75	97	65	0.0762125	0.29222	0.259516	0.356618	0.631068
421	58	143	71	93	64	0.0669746	0.271347	0.245675	0.341912	0.621359
422	70	147	74	98	64	0.0808314	0.278937	0.256055	0.360294	0.621359
423	75	150	67	99	65	0.0866051	0.28463	0.231834	0.363971	0.631068
424	75	142	69	98	65	0.0866051	0.26945	0.238754	0.360294	0.631068
425	64	142	69	100	66	0.073903	0.26945	0.238754	0.367647	0.640777
426	66	138	74	102	66	0.0762125	0.26186	0.256055	0.375	0.640777
427	67	143	65	95	65	0.0773672	0.271347	0.224913	0.349265	0.631068
428	63	144	75	96	64	0.0727483	0.273245	0.259516	0.352941	0.621359
429	64	142	65	98	64	0.073903	0.26945	0.224913	0.360294	0.621359
430	70	135	69	98	65	0.0808314	0.256167	0.238754	0.360294	0.631068
431	74	140	73	98	65	0.0854503	0.265655	0.252595	0.360294	0.631068
432	73	137	72	104	64	0.0842956	0.259962	0.249135	0.382353	0.621359
433	76	145	73	102	64	0.0877598	0.275142	0.252595	0.375	0.621359
434	66	134	70	102	65	0.0762125	0.254269	0.242215	0.375	0.631068
435	76	142	71	99	65	0.0877598	0.26945	0.245675	0.363971	0.631068
436	69	142	70	100	65	0.0796767	0.26945	0.242215	0.367647	0.631068
437	71	144	75	101	65	0.0819861	0.273245	0.259516	0.371324	0.631068
438	74	143	69	97	65	0.0854503	0.271347	0.238754	0.356618	0.631068
439	74	141	71	100	65	0.0854503	0.267552	0.245675	0.367647	0.631068
440	66	150	73	100	66	0.0762125	0.28463	0.252595	0.367647	0.640777
441	64	138	71	97	66	0.073903	0.26186	0.245675	0.356618	0.640777
442	66	149	78	95	66	0.0762125	0.282732	0.269896	0.349265	0.640777
443	65	146	73	96	66	0.0750577	0.27704	0.252595	0.352941	0.640777
444	68	140	67	100	66	0.0785219	0.265655	0.231834	0.367647	0.640777
445	65	152	77	99	66	0.0750577	0.288425	0.266436	0.363971	0.640777
446	65	147	69	102	66	0.0750577	0.278937	0.238754	0.375	0.640777
447	61	144	67	100	66	0.0704388	0.273245	0.231834	0.367647	0.640777
448	64	140	71	102	66	0.073903	0.265655	0.245675	0.375	0.640777
449	57	152	70	97	66	0.0658199	0.288425	0.242215	0.356618	0.640777
450	59	140	75	102	66	0.0681293	0.265655	0.259516	0.375	0.640777
451	67	151	79	97	66	0.0773672	0.286528	0.273356	0.356618	0.640777
452	64	148	71	103	66	0.073903	0.280835	0.245675	0.378676	0.640777
453	68	148	68	96	66	0.0785219	0.280835	0.235294	0.352941	0.640777
454	65	137	61	98	66	0.0750577	0.259962	0.211073	0.360294	0.640777
455	71	143	63	96	66	0.0819861	0.271347	0.217993	0.352941	0.640777
456	74	141	65	101	66	0.0854503	0.267552	0.224913	0.371324	0.640777
457	63	146	76	98	66	0.0727483	0.27704	0.262976	0.360294	0.640777
458	63	143	72	98	65	0.0727483	0.271347	0.249135	0.360294	0.631068
459	64	146	73	98	66	0.073903	0.27704	0.252595	0.360294	0.640777
460	73	142	73	92	66	0.0842956	0.26945	0.252595	0.338235	0.640777
461	75	144	71	95	66	0.0866051	0.273245	0.245675	0.349265	0.640777
462	65	139	71	99	66	0.0750577	0.263757	0.245675	0.363971	0.640777
463	66	145	63	103	66	0.0762125	0.275142	0.217993	0.378676	0.640777
464	68	142	64	102	66	0.0785219	0.26945	0.221453	0.375	0.640777
465	69	148	66	103	66	0.0796767	0.280835	0.228374	0.378676	0.640777
466	63	150	69	103	66	0.0727483	0.28463	0.238754	0.378676	0.640777
467	58	146	71	104	66	0.0669746	0.27704	0.245675	0.382353	0.640777
468	66	148	62	103	67	0.0762125	0.280835	0.214533	0.378676	0.650485
469	63	144	72	103	67	0.0727483	0.273245	0.249135	0.378676	0.650485
470	60	138	66	100	67	0.0692841	0.26186	0.228374	0.367647	0.650485
471	63	137	73	102	66	0.0727483	0.259962	0.252595	0.375	0.640777
472	62	138	71	104	67	0.0715935	0.26186	0.245675	0.382353	0.650485
473	67	137	67	100	67	0.0773672	0.259962	0.231834	0.367647	0.650485
474	66	141	67	104	66	0.0762125	0.267552	0.231834	0.382353	0.640777
475	62	147	70	104	67	0.0715935	0.278937	0.242215	0.382353	0.650485
476	59	139	67	102	65	0.0681293	0.263757	0.231834	0.375	0.631068
477	67	134	72	104	65	0.0773672	0.254269	0.249135	0.382353	0.631068
478	64	139	69	100	64	0.073903	0.263757	0.238754	0.367647	0.621359
479	65	142	77	98	65	0.0750577	0.26945	0.266436	0.360294	0.631068
480	75	144	72	97	65	0.0866051	0.273245	0.249135	0.356618	0.631068
481	63	145	72	99	65	0.0727483	0.275142	0.249135	0.363971	0.631068
482	65	147	66	100	65	0.0750577	0.278937	0.228374	0.367647	0.631068
483	60	147	71	96	65	0.0692841	0.278937	0.245675	0.352941	0.631068
484	69	149	73	96	67	0.0796767	0.282732	0.252595	0.352941	0.650485
485	59	149	62	99	65	0.0681293	0.282732	0.214533	0.363971	0.631068
486	63	147	68	101	66	0.0727483	0.278937	0.235294	0.371324	0.640777
487	66	154	70	97	66	0.0762125	0.29222	0.242215	0.356618	0.640777
488	72	154	73	97	65	0.0831409	0.29222	0.252595	0.356618	0.631068
489	61	147	68	96	68	0.0704388	0.278937	0.235294	0.352941	0.660194
490	70	146	71	95	66	0.0808314	0.27704	0.245675	0.349265	0.640777
491	72	143	71	97	67	0.0831409	0.271347	0.245675	0.356618	0.650485
492	67	147	67	94	66	0.0773672	0.278937	0.231834	0.345588	0.640777
493	64	143	66	96	67	0.073903	0.271347	0.228374	0.352941	0.650485
494	69	144	67	96	66	0.0796767	0.273245	0.231834	0.352941	0.640777
495	73	154	74	97	65	0.0842956	0.29222	0.256055	0.356618	0.631068
496	67	156	70	95	66	0.0773672	0.296015	0.242215	0.349265	0.640777
497	67	152	73	97	65	0.0773672	0.288425	0.252595	0.356618	0.631068
498	75	154	75	98	65	0.0866051	0.29222	0.259516	0.360294	0.631068
499	73	143	76	100	65	0.0842956	0.271347	0.262976	0.367647	0.631068
500	63	154	77	95	65	0.0727483	0.29222	0.266436	0.349265	0.631068
