# Supplementary material for: Sublytic gasdermin-D pores captured in atomistic molecular simulations
Source: eLife. 2022 Nov 14;11:e81432. doi: 10.7554/eLife.81432 (PMC9699695; doi:10.7554/eLife.81432)
Supplement: Figure 1—source data 1. [file elife-81432-fig1-data1.xlsx]

## Sheet: Sheet1
Time (ns)	Prepore	Pore
0	1	4
10	12	5
20	14	5
30	14	8
40	14	7
50	19	7
60	15	7
70	18	7
80	18	9
90	16	6
100	17	6
110	15	9
120	16	12
130	18	9
140	17	9
150	21	8
160	20	8
170	20	9
180	21	9
190	21	8
200	21	8
210	19	11
220	19	12
230	21	11
240	21	12
250	22	9
260	23	11
270	23	10
280	20	9
290	22	13
300	21	11
310	19	11
320	21	11
330	19	12
340	21	10
350	22	10
360	21	14
370	17	10
380	21	12
390	16	13
400	20	13
410	21	11
420	19	14
430	18	13
440	18	15
450	22	14
460	19	14
470	18	11
480	20	12
490	21	11
500	25	13
510	22	13
520	24	13
530	20	11
540	25	13
550	21	13
560	25	9
570	21	12
580	20	11
590	22	12
600	20	13
610	21	12
620	25	12
630	21	10
640	20	10
650	23	10
660	24	11
670	23	12
680	21	13
690	22	11
700	23	11
710	25	11
720	24	12
730	26	11
740	25	12
750	23	10
760	25	11
770	23	12
780	25	12
790	26	12
800	25	13
810	27	14
820	23	13
830	27	14
840	28	12
850	24	14
860	26	11
870	25	12
880	26	10
890	23	12
900	26	14
910	25	14
920	24	12
930	22	11
940	25	9
950	23	10
960	24	10
970	25	10
980	22	12
990	23	10
1000	28	12
1010	23	14
1020	24	13
1030	22	12
1040	25	10
1050	24	11
1060	22	11
1070	25	11
1080	22	13
1090	23	13
1100	27	13
1110	25	14
1120	25	14
1130	24	12
1140	31	12
1150	30	13
1160	23	13
1170	27	13
1180	25	12
1190	26	13
1200	23	13
1210	25	13
1220	25	12
1230	22	11
1240	23	13
1250	23	12
1260	26	9
1270	26	10
1280	24	11
1290	25	10
1300	22	11
1310	24	11
1320	22	11
1330	25	11
1340	23	12
1350	22	10
1360	23	12
1370	20	10
1380	24	10
1390	24	12
1400	24	11
1410	24	13
1420	25	9
1430	25	11
1440	27	11
1450	23	11
1460	24	11
1470	22	10
1480	25	10
1490	26	10
1500	26	12
1510	23	12
1520	23	13
1530	24	10
1540	26	11
1550	23	10
1560	26	13
1570	26	11
1580	23	12
1590	22	13
1600	25	12
1610	23	13
1620	24	12
1630	24	10
1640	27	11
1650	25	12
1660	24	12
1670	28	12
1680	26	11
1690	26	12
1700	27	11
1710	28	10
1720	25	11
1730	28	10
1740	23	9
1750	26	10
1760	21	9
1770	24	10
1780	24	10
1790	23	11
1800	25	10
1810	24	10
1820	25	9
1830	30	8
1840	27	10
1850	26	11
1860	29	8
1870	26	10
1880	25	11
1890	29	11
1900	27	10
1910	30	11
1920	26	8
1930	25	8
1940	27	9
1950	26	12
1960	26	11
1970	24	10
1980	24	10
1990	27	11
2000	25	11
2010	26	10
2020	24	12
2030	26	10
2040	25	10
2050	26	12
2060	24	11
2070	25	12
2080	25	13
2090	26	12
2100	27	13
2110	26	12
2120	25	14
2130	28	15
2140	29	15
2150	28	13
2160	28	10
2170	30	13
2180	28	13
2190	27	14
2200	26	14
2210	29	14
2220	30	13
2230	29	15
2240	29	17
2250	28	15
2260	28	13
2270	26	11
2280	28	15
2290	25	11
2300	26	13
2310	27	14
2320	27	16
2330	25	13
2340	25	12
2350	30	12
2360	27	11
2370	25	12
2380	27	14
2390	25	13
2400	27	14
2410	29	13
2420	29	12
2430	30	12
2440	29	13
2450	32	14
2460	30	12
2470	28	15
2480	31	14
2490	30	16
2500	29	13
2510	29	15
2520	29	15
2530	28	14
2540	28	14
2550	27	13
2560	30	15
2570	26	13
2580	30	14
2590	27	15
2600	29	15
2610	27	12
2620	30	15
2630	29	13
2640	28	15
2650	27	15
2660	29	16
2670	28	12
2680	30	14
2690	29	14
2700	27	14
2710	30	13
2720	29	15
2730	29	15
2740	29	18
2750	27	17
2760	28	15
2770	25	15
2780	28	14
2790	26	14
2800	27	15
2810	25	15
2820	25	17
2830	28	13
2840	26	15
2850	28	16
2860	26	17
2870	30	17
2880	26	15
2890	30	16
2900	26	16
2910	26	18
2920	27	16
2930	27	18
2940	25	14
2950	27	16
2960	29	17
2970	27	15
2980	27	16
2990	30	15
3000	25	15
3010	27	17
3020	27	17
3030	30	16
3040	33	14
3050	24	16
3060	26	17
3070	29	16
3080	27	19
3090	30	16
3100	29	17
3110	28	19
3120	29	17
3130	29	18
3140	28	18
3150	28	18
3160	27	17
3170	30	18
3180	27	17
3190		18
3200		16
3210		19
3220		15
3230		17
3240		17
3250		17
3260		17
3270		18
3280		15
3290		18
3300		18
3310		17
3320		15
3330		19
3340		17
3350		16
3360		19
3370		19
3380		17
3390		14
3400		14
3410		15
3420		15
3430		12
3440		12
3450		14
3460		13
3470		14
3480		14
3490		14
3500		14
3510		16
3520		17
3530		17
3540		16
3550		17
3560		17
3570		17
3580		16
3590		16
3600		18
3610		16
3620		17
3630		15
3640		17
3650		18
3660		15
3670		15
3680		16
3690		15
3700		14
3710		14
3720		15
3730		13
3740		15
3750		15
3760		14
3770		18
3780		17
3790		17
3800		19
3810		17
3820		17
3830		19
3840		20
3850		19
3860		19
3870		21
3880		21
3890		21
3900		19
3910		21
3920		20
3930		19
3940		18
3950		21
3960		22
3970		19
3980		17
3990		19
4000		16
4010		18
4020		19
4030		18
4040		18
4050		20
4060		19
4070		21
4080		21
4090		21
4100		23
4110		21
4120		21
4130		22
4140		22
4150		23
4160		22
4170		23
4180		22
4190		24
4200		22
4210		23
4220		19
4230		24
4240		21
4250		20
4260		19
4270		19
4280		19
4290		18
4300		18
4310		21
4320		19
4330		20
4340		22
4350		21
4360		21
4370		22
4380		22
4390		18
4400		20
4410		19
4420		22
4430		23
4440		21
4450		22
4460		20
4470		22
4480		23
4490		22
4500		22
4510		23
4520		24
4530		24
4540		22
4550		23
4560		21
4570		23
4580		20
4590		23
4600		20
4610		20
4620		21
4630		22
4640		21
4650		20
4660		22
4670		21
4680		24
4690		23
4700		21
4710		25
4720		25
4730		23
4740		20
4750		22
4760		22
4770		20
4780		21
4790		22
4800		20
4810		22
4820		19
4830		21
4840		21
4850		21
4860		22
4870		21
4880		20
4890		22
4900		23
4910		22
4920		22
4930		22
4940		23
4950		21
4960		21
4970		22
4980		23
4990		23
5000		21
5010		21
5020		20
5030		20
5040		22
5050		23
5060		21
5070		22
5080		23
5090		20
5100		19
5110		20
5120		21
5130		22
5140		17
5150		19
5160		19
5170		22
5180		22
5190		18
5200		22
5210		21
5220		23
5230		22
5240		21
5250		20
5260		19
5270		20
5280		20
5290		21
5300		22
5310		22
5320		22
5330		23
5340		21
5350		21
5360		21
5370		20
5380		18
5390		18
5400		20
5410		18
5420		19
5430		20
5440		23
5450		18
5460		22
5470		21
5480		20
5490		21
5500		21
5510		21
5520		24
5530		21
5540		25
5550		23
5560		25
5570		23
5580		22
5590		24
5600		24
5610		24
5620		21
5630		19
5640		23
5650		20
5660		22
5670		22
5680		24
5690		20
5700		20
5710		22
5720		22
5730		23
5740		22
5750		23
5760		22
5770		24
5780		20
5790		22
5800		22
5810		22
5820		21
5830		21
5840		17
5850		19
5860		22
5870		22
5880		23
5890		21
5900		20
5910		21
5920		20
5930		22
5940		20
5950		19
5960		21
5970		17
5980		19
5990		21
6000		24
6010		19
6020		20
6030		19
6040		21
6050		19
6060		20
6070		21
6080		20
6090		21
6100		20
6110		20
6120		20
6130		19
6140		20
6150		20
6160		19
6170		18
6180		18
6190		16
6200		16
6210		22
6220		20
6230		18
6240		18
6250		19
6260		20
6270		22
6280		22
6290		17
6300		19
6310		21
6320		17
6330		21
6340		23
6350		25
6360		19
6370		21
6380		18
6390		20
6400		23
6410		22
6420		24
6430		24
6440		22
6450		22
6460		23
6470		24
6480		21
6490		26
6500
