# Supplementary material for: Sublytic gasdermin-D pores captured in atomistic molecular simulations
Source: eLife. 2022 Nov 14;11:e81432. doi: 10.7554/eLife.81432 (PMC9699695; doi:10.7554/eLife.81432)
Supplement: Figure 4—source data 1. [file elife-81432-fig4-data1.xlsx]

## Sheet: Sheet1
Time (ns)	Dimer	Trimer	Pentamer	Octamer	Decamer
0	0	0	0	0	0
1	0	0	0	0	0
2	0	0	0	0	0
3	0	0	0	0	0
4	0	0	0	0	0
5	0	0	0	0	0
6	0	0	0	0	0
7	0	0	0	0	0
8	0	0	0	0	0
9	0	0	0	0	0
10	0	0	0	0	0
11	0	0	0	0	0
12	0	0	0	0	0
13	0	0	0	0	0
14	0	0	0	0	0
15	0	0	0	0	0
16	0	0	0	0	0
17	0	0	0	0	2
18	0	0	0	0	4
19	0	0	0	1	4
20	0	0	1	2	6
21	0	0	1	2	6
22	0	0	1	2	7
23	0	0	2	2	7
24	0	0	3	2	8
25	0	0	3	2	8
26	0	0	3	2	8
27	0	0	3	2	8
28	0	0	4	3	9
29	0	0	4	3	9
30	0	0	4	3	10
31	0	0	5	3	10
32	0	0	5	3	10
33	0	0	5	5	10
34	0	0	6	5	10
35	0	0	6	5	10
36	0	0	6	5	12
37	0	0	6	7	12
38	0	0	7	8	12
39	0	0	7	8	13
40	0	0	7	8	13
41	0	0	7	9	13
42	0	1	7	9	14
43	0	1	8	9	14
44	0	1	8	9	14
45	0	1	10	9	14
46	0	1	10	9	14
47	0	1	11	9	14
48	0	1	11	9	14
49	0	1	11	9	14
50	0	1	11	9	14
51	0	1	11	9	15
52	0	1	11	9	15
53	0	1	11	9	17
54	0	1	12	10	17
55	0	1	12	10	17
56	0	1	12	10	17
57	0	1	12	10	19
58	0	1	12	12	19
59	0	1	12	12	19
60	0	1	13	12	19
61	0	1	13	12	20
62	0	1	13	12	20
63	0	1	13	13	20
64	0	1	13	13	20
65	0	1	13	13	20
66	0	1	13	13	20
67	0	1	13	14	20
68	0	1	13	14	23
69	0	1	13	15	23
70	0	1	13	15	24
71	0	1	14	15	24
72	0	1	14	15	24
73	0	1	14	16	24
74	0	1	14	16	24
75	0	1	14	17	25
76	0	1	15	18	26
77	0	1	15	18	26
78	0	1	16	18	27
79	0	1	16	18	29
80	0	1	16	18	29
81	0	1	16	18	29
82	0	1	16	18	29
83	0	1	16	18	29
84	0	2	16	18	29
85	0	2	17	18	29
86	0	3	18	18	31
87	0	3	18	19	33
88	0	3	18	19	33
89	0	3	18	19	33
90	0	3	18	20	33
91	0	3	18	20	35
92	0	3	19	20	37
93	0	3	20	20	38
94	0	3	21	21	38
95	0	3	21	21	38
96	0	3	21	22	38
97	0	3	22	23	38
98	0	3	22	23	38
99	0	3	22	24	38
100	0	3	22	26	39
101	0	3	22	26	39
102	0	3	22	26	42
103	0	3	22	26	42
104	0	3	22	26	42
105	0	3	22	27	44
106	0	3	23	28	45
107	0	3	23	29	46
108	0	3	23	29	46
109	0	3	24	29	47
110	0	3	25	29	47
111	0	3	25	30	47
112	0	3	25	30	47
113	0	3	27	30	48
114	0	3	27	31	48
115	0	3	28	31	48
116	0	3	28	31	48
117	0	3	29	32	49
118	0	3	29	32	51
119	0	3	31	32	52
120	0	3	31	33	52
121	0	4	31	33	52
122	0	4	31	33	52
123	0	4	31	35	52
124	0	4	32	37	52
125	0	4	32	37	55
126	0	4	33	37	56
127	0	4	33	37	57
128	0	4	33	38	57
129	0	4	34	38	58
130	0	4	34	39	58
131	0	4	34	42	58
132	0	4	35	42	58
133	0	4	36	42	59
134	0	4	36	42	59
135	0	4	37	42	60
136	0	4	37	42	60
137	0	4	37	43	61
138	0	4	38	43	61
139	0	4	38	43	61
140	0	4	38	43	62
141	0	4	38	43	62
142	0	4	38	43	64
143	0	4	38	44	65
144	0	4	39	44	66
145	0	4	39	44	67
146	0	4	40	46	68
147	0	4	40	46	68
148	0	4	40	46	68
149	0	4	40	46	68
150	0	4	40	46	68
151	0	4	40	46	69
152	0	4	41	47	69
153	0	4	41	47	69
154	0	4	41	48	69
155	0	4	41	48	70
156	0	4	41	48	71
157	0	4	41	49	72
158	0	4	41	49	72
159	0	4	41	49	74
160	0	4	41	49	74
161	0	4	42	49	74
162	0	4	42	50	74
163	0	4	43	50	75
164	0	4	45	50	76
165	0	4	45	50	77
166	0	4	45	50	77
167	0	4	45	50	77
168	0	4	46	53	78
169	0	4	48	53	78
170	0	4	48	54	79
171	0	4	49	54	82
172	0	4	49	55	82
173	0	4	49	55	83
174	0	5	49	55	84
175	0	5	49	55	85
176	0	5	50	56	85
177	0	5	50	57	86
178	0	5	51	57	86
179	0	5	52	57	88
180	0	5	52	59	90
181	0	5	54	59	91
182	0	5	54	60	91
183	0	5	54	60	93
184	0	5	54	60	95
185	0	5	55	61	95
186	0	5	55	62	96
187	0	6	55	63	96
188	0	6	55	65	96
189	0	6	56	66	96
190	0	6	56	66	96
191	0	6	56	67	97
192	0	6	57	67	97
193	0	6	57	67	97
194	0	6	58	67	97
195	0	6	58	67	97
196	0	6	58	69	99
197	0	7	59	69	100
198	0	7	59	70	100
199	0	7	59	70	100
200	0	7	59	71	100
201	0	7	59	71	101
202	0	7	60	71	101
203	0	7	61	71	102
204	0	7	61	72	102
205	0	7	61	72	103
206	0	7	61	72	103
207	0	7	61	73	103
208	0	7	61	73	104
209	0	7	62	73	104
210	0	7	62	75	105
211	0	7	62	75	106
212	0	8	62	75	106
213	0	8	62	76	106
214	0	8	62	76	106
215	0	8	62	76	106
216	0	8	63	76	109
217	0	8	63	76	109
218	0	8	63	76	109
219	0	8	64	76	109
220	0	8	64	76	109
221	1	8	64	76	110
222	1	8	64	76	111
223	1	8	64	76	111
224	1	8	64	77	112
225	1	8	65	78	112
226	1	8	66	79	112
227	1	8	67	79	113
228	1	9	67	79	113
229	1	9	67	79	114
230	1	10	67	79	114
231	1	10	67	79	114
232	1	10	68	80	115
233	1	10	68	80	115
234	1	10	68	80	115
235	1	10	68	81	116
236	1	10	68	81	116
237	1	10	69	81	117
238	1	10	70	82	118
239	1	10	71	82	119
240	2	10	71	83	120
241	2	10	71	84	120
242	2	10	71	84	121
243	2	10	71	84	121
244	2	10	71	85	121
245	2	10	71	85	123
246	2	10	71	86	124
247	2	10	71	86	126
248	2	10	72	86	126
249	2	10	72	87	126
250	2	10	72	88	127
251	2	10	73	88	127
252	2	11	73	88	128
253	2	11	74	88	128
254	2	11	74	88	128
255	2	11	75	88	128
256	2	11	75	89	129
257	2	11	75	90	129
258	2	11	77	90	129
259	2	11	77	90	129
260	2	11	78	90	130
261	2	11	78	90	132
262	2	11	79	90	132
263	2	11	79	90	132
264	2	11	79	91	132
265	2	11	79	91	132
266	2	12	80	91	132
267	2	12	81	92	133
268	2	12	81	93	135
269	2	12	81	93	135
270	2	12	81	94	136
271	2	12	81	94	137
272	2	12	82	94	138
273	2	12	82	94	138
274	2	12	82	95	139
275	2	12	82	95	139
276	2	12	83	96	140
277	2	12	83	97	141
278	2	12	83	97	141
279	2	12	84	97	141
280	2	12	85	97	141
281	2	12	86	97	142
282	2	12	86	97	144
283	2	12	86	97	145
284	2	12	87	97	148
285	2	12	87	99	148
286	2	12	88	99	148
287	2	12	88	99	150
288	2	12	89	99	151
289	2	12	89	100	153
290	2	12	89	100	153
291	2	12	89	100	153
292	2	12	89	100	154
293	2	12	89	102	155
294	2	12	89	103	156
295	2	12	89	104	156
296	2	12	89	106	156
297	3	12	89	107	156
298	3	12	89	107	156
299	3	13	89	108	156
300	3	13	89	108	157
301	3	13	89	108	158
302	3	13	90	109	158
303	4	13	90	110	159
304	4	13	90	110	159
305	4	13	91	111	161
306	4	13	91	112	161
307	4	13	91	112	163
308	4	13	91	112	163
309	4	13	91	113	163
310	4	13	91	113	163
311	4	13	91	113	164
312	4	13	91	114	166
313	4	13	91	114	166
314	4	13	91	114	167
315	4	13	92	114	167
316	4	13	93	116	170
317	4	13	93	116	170
318	4	13	93	116	170
319	4	13	93	118	171
320	4	14	94	118	172
321	4	14	94	118	172
322	4	14	94	118	173
323	4	14	94	119	174
324	4	14	95	119	174
325	4	15	95	119	175
326	4	15	95	120	175
327	4	15	95	121	175
328	4	15	95	121	176
329	4	15	95	122	177
330	4	15	96	123	177
331	4	15	96	123	177
332	4	15	96	123	178
333	4	15	96	123	178
334	4	15	96	124	178
335	4	15	96	124	178
336	4	15	96	124	178
337	4	15	96	124	180
338	4	15	96	124	180
339	4	15	96	124	181
340	4	15	96	124	182
341	4	15	97	124	182
342	4	15	97	124	184
343	4	15	97	124	185
344	4	15	98	124	185
345	4	15	98	124	187
346	4	15	98	125	188
347	4	15	98	125	189
348	4	15	98	125	190
349	4	15	98	125	190
350	4	15	98	126	192
351	4	15	98	126	192
352	4	15	98	126	193
353	4	15	98	127	193
354	4	15	99	127	193
355	4	15	99	127	193
356	5	15	99	127	194
357	5	15	100	127	194
358	5	15	100	127	195
359	5	15	100	127	195
360	5	15	101	128	195
361	5	15	101	128	195
362	5	15	101	128	195
363	5	15	102	129	196
364	5	15	102	129	196
365	5	15	102	129	196
366	5	15	103	130	197
367	5	15	103	130	197
368	5	15	103	131	197
369	5	15	103	131	199
370	5	15	103	131	199
371	5	15	103	131	199
372	5	15	103	131	199
373	5	15	103	131	199
374	5	15	103	131	199
375	5	15	103	131	200
376	5	15	105	131	200
377	5	15	105	131	200
378	5	15	105	132	201
379	5	15	105	132	201
380	5	15	105	133	202
381	5	15	105	133	202
382	5	15	105	135	203
383	5	15	105	135	205
384	5	15	106	135	205
385	5	15	106	135	206
386	5	15	106	135	207
387	5	15	106	137	207
388	5	15	107	137	208
389	5	15	107	138	208
390	5	15	107	139	208
391	5	15	107	139	208
392	5	15	107	139	208
393	5	15	107	139	209
394	5	15	107	139	209
395	5	15	107	139	209
396	5	15	108	139	209
397	5	15	108	139	209
398	5	15	108	139	209
399	5	15	108	139	209
400	5	15	108	139	210
401	5	15	108	139	210
402	5	15	108	140	210
403	5	15	108	140	210
404	5	15	108	141	210
405	5	15	108	141	212
406	5	15	108	141	212
407	5	15	108	141	213
408	5	15	109	141	214
409	5	15	109	142	216
410	5	15	109	142	217
411	5	15	109	142	217
412	5	16	109	142	219
413	5	16	109	142	219
414	5	16	109	143	220
415	5	16	111	143	221
416	5	16	111	143	221
417	5	16	111	143	222
418	5	16	111	143	222
419	5	16	111	144	222
420	5	16	111	145	222
421	5	16	111	146	223
422	5	16	111	146	224
423	5	16	111	147	225
424	5	16	111	147	225
425	5	16	111	147	226
426	5	16	111	148	226
427	5	16	111	148	226
428	5	16	112	149	226
429	5	16	112	149	226
430	5	16	112	149	226
431	5	16	112	150	226
432	5	16	112	150	226
433	5	16	112	151	226
434	5	16	112	151	227
435	5	16	112	151	227
436	5	16	112	153	227
437	5	16	113	154	227
438	5	16	113	154	227
439	5	16	114	154	227
440	5	16	114	154	228
441	5	16	114	154	229
442	5	16	114	154	230
443	5	16	114	155	230
444	5	16	115	155	231
445	5	16	115	157	231
446	5	16	115	157	231
447	5	16	116	157	231
448	5	16	116	159	232
449	5	16	116	159	233
450	5	16	116	159	235
451	5	16	116	159	235
452	5	16	116	159	235
453	5	16	118	159	236
454	5	16	118	159	236
455	5	16	118	159	236
456	5	16	118	159	236
457	5	16	119	161	237
458	5	16	119	161	237
459	5	16	119	161	237
460	5	16	119	162	240
461	5	16	119	162	241
462	5	16	119	162	241
463	5	16	119	162	241
464	5	16	119	162	241
465	5	16	119	162	241
466	5	16	120	162	242
467	5	16	120	163	242
468	5	16	120	163	242
469	5	16	120	163	244
470	5	16	120	164	244
471	5	16	120	164	244
472	5	16	120	164	244
473	5	16	120	165	244
474	5	16	120	165	244
475	5	16	120	167	244
476	5	16	120	168	245
477	5	16	120	168	246
478	5	16	121	168	247
479	5	16	121	169	248
480	5	16	122	169	248
481	5	16	122	169	249
482	5	16	122	169	250
483	5	16	122	169	250
484	5	16	122	171	250
485	5	16	122	172	250
486	5	16	122	172	251
487	5	16	122	175	252
488	5	16	122	175	252
489	5	16	122	175	252
490	5	16	122	175	253
491	5	16	122	175	254
492	5	16	122	175	254
493	5	16	122	176	256
494	5	16	122	176	257
495	5	16	122	176	260
496	5	16	123	177	261
497	5	16	123	177	261
498	5	16	123	177	261
499	5	16	123	178	261
500	5	16	124	178	262
501	5	16	124	178	262
502	5	16	124	178	264
503	5	16	125	178	264
504	5	16	125	178	264
505	5	16	126	179	265
506	5	16	126	180	265
507	5	16	127	180	265
508	5	16	127	180	265
509	5	16	128	181	267
510	5	16	128	181	267
511	5	16	128	181	267
512	5	16	128	183	267
513	5	16	128	184	268
514	5	16	128	184	268
515	5	16	128	185	268
516	5	16	128	185	268
517	5	16	129	185	269
518	5	16	130	185	270
519	5	16	130	186	272
520	5	16	130	186	274
521	5	16	131	186	275
522	5	16	131	186	276
523	5	16	131	186	276
524	5	16	131	186	276
525	5	16	131	187	276
526	5	16	131	188	277
527	5	16	131	188	277
528	5	16	131	189	277
529	5	16	131	190	277
530	5	16	132	190	278
531	5	16	132	190	279
532	5	16	133	191	279
533	5	16	133	191	280
534	5	16	133	191	280
535	5	16	134	191	281
536	5	16	134	192	281
537	5	16	135	192	281
538	5	17	135	192	281
539	5	17	135	192	281
540	5	17	135	192	281
541	5	17	135	192	281
542	5	17	135	193	281
543	5	17	135	193	281
544	5	17	136	194	281
545	5	17	136	194	282
546	5	17	136	194	282
547	5	17	136	195	282
548	5	17	136	195	284
549	5	17	136	196	284
550	5	17	136	196	285
551	5	17	136	196	285
552	5	17	136	196	286
553	5	17	137	197	286
554	5	17	137	197	286
555	5	17	138	198	286
556	5	17	138	198	287
557	5	17	138	198	287
558	5	17	138	199	287
559	5	17	138	199	288
560	5	17	138	199	288
561	5	17	138	199	291
562	5	17	140	200	291
563	5	17	141	201	291
564	5	17	141	201	291
565	5	17	142	201	291
566	5	17	142	203	291
567	5	17	142	203	292
568	5	17	142	204	293
569	5	17	142	204	294
570	5	17	142	205	294
571	5	17	142	206	295
572	5	17	142	207	295
573	5	17	142	207	295
574	5	17	142	207	296
575	5	17	142	207	297
576	5	17	142	207	297
577	5	17	142	207	297
578	5	17	142	207	297
579	5	17	142	207	297
580	5	17	142	207	297
581	5	17	142	207	297
582	5	17	142	208	297
583	5	17	143	208	298
584	5	17	143	208	298
585	5	17	143	208	299
586	5	17	143	210	299
587	5	17	143	210	300
588	5	17	143	210	301
589	5	17	143	210	302
590	5	17	143	210	302
591	5	17	143	210	303
592	5	17	144	210	303
593	5	17	144	210	303
594	5	17	144	210	303
595	5	17	144	211	304
596	5	17	144	211	305
597	5	17	144	211	305
598	5	17	144	211	305
599	5	17	144	211	306
600	5	17	146	211	307
601	5	17	146	212	308
602	5	17	146	212	308
603	5	17	146	212	309
604	5	17	146	212	313
605	5	17	146	212	314
606	5	17	146	213	314
607	5	17	146	214	314
608	5	17	147	214	315
609	5	17	147	214	315
610	5	17	147	214	315
611	5	17	147	214	316
612	5	17	147	214	317
613	5	17	147	215	317
614	5	17	147	215	317
615	5	17	147	215	318
616	5	17	147	215	318
617	5	17	147	215	318
618	5	17	147	216	318
619	5	17	147	217	318
620	5	17	147	217	319
621	5	17	147	217	320
622	5	17	147	217	320
623	5	17	147	218	321
624	5	17	147	218	322
625	5	17	148	218	323
626	5	17	149	218	323
627	5	17	149	219	323
628	5	17	149	219	323
629	5	17	150	219	324
630	5	17	150	219	325
631	5	17	150	220	325
632	5	17	151	220	325
633	5	17	151	220	325
634	5	17	151	221	325
635	5	17	152	222	325
636	5	17	152	222	326
637	5	17	152	222	328
638	5	17	152	223	328
639	5	17	152	223	328
640	5	17	152	223	328
641	5	17	152	223	328
642	5	17	152	223	328
643	5	17	152	223	328
644	5	17	152	223	330
645	5	18	152	223	331
646	5	18	152	223	331
647	5	18	152	223	331
648	5	18	152	224	333
649	5	18	152	224	333
650	5	18	153	224	334
651	5	18	153	224	335
652	5	18	153	225	335
653	5	18	153	226	335
654	5	18	153	226	335
655	5	18	153	226	336
656	5	18	153	226	336
657	5	18	153	226	336
658	5	18	153	227	336
659	5	19	153	228	336
660	5	19	153	228	336
661	5	19	153	228	336
662	5	19	153	228	337
663	5	19	153	229	338
664	5	19	153	229	339
665	5	19	153	229	340
666	5	19	153	230	340
667	5	19	153	230	340
668	5	19	153	231	340
669	5	19	153	231	341
670	5	19	153	231	341
671	5	19	153	231	342
672	5	19	153	231	342
673	5	19	153	232	343
674	5	19	153	232	343
675	5	19	153	233	343
676	5	19	155	233	343
677	5	19	155	233	345
678	5	19	155	233	345
679	5	19	155	234	345
680	5	19	156	235	345
681	5	19	156	235	348
682	5	19	156	235	348
683	5	19	156	235	348
684	5	19	156	235	349
685	5	19	156	235	349
686	5	19	156	235	351
687	5	19	156	235	351
688	5	19	156	235	351
689	5	19	156	235	351
690	5	19	156	235	351
691	5	19	157	235	351
692	5	19	157	236	351
693	5	19	157	236	351
694	5	19	157	236	351
695	5	19	157	236	351
696	5	19	157	236	351
697	5	19	157	236	351
698	5	19	158	236	351
699	5	19	158	236	351
700	5	19	158	237	352
701	5	19	159	237	352
702	5	19	159	237	354
703	5	19	159	237	354
704	5	19	159	237	354
705	5	19	159	237	354
706	5	19	160	237	354
707	5	19	160	237	354
708	5	19	161	237	354
709	5	19	161	237	354
710	5	19	161	238	354
711	5	19	161	238	355
712	5	19	161	238	355
713	5	19	161	238	356
714	5	19	161	239	356
715	5	19	161	239	357
716	5	19	161	239	358
717	5	19	161	239	358
718	5	19	161	242	358
719	5	19	161	242	359
720	5	19	161	242	359
721	5	19	161	242	361
722	5	19	161	243	361
723	5	19	162	243	363
724	5	19	162	243	363
725	5	19	163	243	364
726	5	19	163	243	364
727	5	19	163	243	364
728	5	19	163	244	364
729	5	19	163	245	364
730	5	19	163	245	364
731	5	20	164	245	364
732	5	20	164	245	364
733	5	20	164	245	364
734	5	20	164	246	365
735	5	20	164	246	365
736	5	20	165	247	367
737	5	20	165	247	367
738	5	20	165	249	367
739	5	20	165	249	367
740	5	20	166	249	367
741	5	20	166	249	368
742	5	20	166	249	368
743	5	20	166	250	368
744	5	20	166	250	369
745	5	20	166	250	370
746	5	20	167	250	370
747	5	21	167	250	370
748	5	21	167	250	370
749	5	21	167	250	370
750	5	21	168	250	371
751	5	21	168	250	371
752	5	21	168	250	372
753	5	21	168	250	372
754	5	21	168	250	374
755	5	21	168	251	374
756	5	21	168	252	375
757	5	21	168	254	375
758	5	21	168	254	376
759	5	21	168	255	376
760	5	22	169	255	379
761	5	22	169	257	381
762	5	22	169	257	381
763	5	22	169	258	381
764	5	22	169	259	382
765	5	22	169	259	382
766	5	22	169	259	382
767	5	22	169	259	383
768	5	22	169	259	385
769	5	22	169	259	386
770	5	22	169	260	386
771	5	22	169	260	386
772	5	22	169	261	386
773	5	22	169	261	386
774	5	22	169	262	386
775	5	22	169	262	386
776	5	22	169	263	386
777	5	22	169	263	386
778	5	22	170	264	386
779	5	22	170	264	387
780	5	22	170	264	388
781	5	22	170	264	389
782	5	22	171	264	389
783	5	22	171	264	389
784	5	22	171	264	390
785	5	22	171	264	391
786	5	22	171	264	391
787	5	22	171	264	391
788	5	22	172	264	393
789	5	22	172	264	393
790	5	22	172	264	395
791	5	22	172	264	396
792	5	22	172	264	396
793	5	22	172	264	396
794	5	22	172	264	396
795	5	22	172	264	396
796	5	22	172	264	396
797	5	22	173	264	398
798	5	22	173	264	398
799	5	22	173	265	400
800	5	22	174	265	400
801	5	22	174	265	401
802	5	22	174	266	403
803	5	22	174	266	403
804	5	22	174	266	404
805	5	22	174	266	405
806	5	22	174	266	405
807	5	22	174	266	405
808	5	22	174	267	405
809	5	22	174	268	405
810	5	22	174	268	406
811	5	22	175	269	407
812	5	22	175	269	407
813	5	22	175	269	408
814	5	22	175	270	408
815	5	22	175	270	409
816	5	22	175	270	409
817	5	22	177	271	410
818	5	22	177	271	411
819	5	22	177	271	412
820	5	22	177	271	412
821	5	22	177	271	412
822	5	22	177	272	413
823	5	22	178	273	413
824	5	22	178	273	413
825	5	22	178	273	413
826	5	22	178	275	416
827	5	22	178	275	417
828	5	22	178	275	418
829	5	22	179	276	418
830	5	22	180	276	420
831	5	22	180	276	420
832	5	22	180	276	420
833	5	22	181	277	420
834	5	22	181	277	421
835	5	22	181	277	421
836	5	22	181	277	423
837	5	22	181	277	423
838	5	22	181	277	423
839	5	22	181	277	424
840	5	22	181	277	424
841	5	22	182	277	425
842	5	22	182	277	425
843	5	22	183	279	425
844	5	22	183	279	425
845	5	22	183	281	426
846	5	22	183	281	426
847	5	22	183	281	426
848	5	22	183	281	426
849	5	22	183	281	426
850	5	22	184	282	427
851	5	22	184	282	427
852	5	22	184	282	428
853	5	22	184	282	428
854	5	22	184	282	429
855	5	22	184	282	430
856	5	22	184	282	432
857	5	22	184	282	432
858	5	22	184	282	432
859	5	22	185	282	432
860	5	23	186	282	432
861	5	23	186	282	432
862	5	23	186	282	432
863	5	23	186	283	432
864	5	23	186	283	432
865	5	23	186	284	432
866	5	23	186	285	432
867	5	23	186	285	433
868	5	23	186	285	434
869	5	23	186	285	434
870	5	23	187	287	434
871	5	23	187	287	434
872	5	23	187	288	434
873	5	23	187	288	436
874	5	23	187	289	436
875	5	23	189	289	437
876	5	23	189	289	438
877	5	23	189	289	438
878	5	23	189	289	439
879	5	23	189	289	439
880	5	23	189	289	439
881	5	23	189	289	439
882	5	23	189	289	439
883	5	23	189	289	439
884	5	24	189	289	440
885	5	24	190	289	440
886	5	24	190	289	442
887	5	24	190	289	443
888	5	25	191	289	445
889	5	25	191	289	446
890	5	25	191	290	446
891	5	25	191	290	446
892	5	25	192	290	446
893	5	25	192	290	447
894	5	25	192	290	447
895	5	25	193	290	447
896	5	25	193	291	447
897	5	25	194	291	447
898	5	25	194	291	447
899	5	25	194	291	449
900	5	25	195	291	449
901	5	25	195	291	449
902	5	25	195	291	449
903	5	25	195	291	450
904	5	25	195	291	451
905	5	25	195	291	451
906	5	25	195	291	452
907	5	25	195	292	452
908	5	25	195	292	453
909	5	25	195	292	454
910	5	25	195	293	454
911	5	25	195	294	454
912	5	25	195	294	454
913	5	25	195	294	454
914	5	25	196	294	454
915	5	25	196	295	455
916	5	25	196	296	456
917	5	25	197	296	456
918	5	25	197	296	456
919	5	25	197	296	456
920	5	25	197	296	457
921	5	25	198	297	457
922	5	25	198	297	458
923	5	25	198	297	459
924	5	25	198	297	459
925	5	25	198	297	460
926	5	25	198	297	460
927	5	25	198	297	461
928	5	25	198	297	462
929	5	25	198	297	463
930	5	25	198	299	464
931	5	25	198	299	464
932	5	25	199	299	464
933	5	25	199	299	465
934	5	25	199	299	465
935	5	25	199	300	467
936	5	25	200	300	467
937	5	25	200	300	468
938	5	25	200	300	469
939	5	25	200	300	469
940	5	25	200	300	470
941	5	25	200	300	470
942	5	25	200	300	470
943	5	25	200	300	470
944	5	25	200	300	470
945	5	25	201	300	471
946	5	25	202	300	471
947	5	25	202	300	471
948	5	25	203	300	472
949	5	25	203	301	472
950	5	25	203	301	472
951	5	25	203	301	473
952	5	25	203	302	474
953	5	25	203	302	475
954	5	25	203	302	475
955	5	25	203	302	475
956	5	25	203	302	475
957	5	25	203	303	475
958	5	25	203	303	476
959	5	25	203	303	476
960	5	25	204	303	476
961	5	25	204	303	478
962	5	25	204	303	479
963	5	25	204	303	480
964	5	25	204	303	480
965	5	25	204	303	480
966	5	25	204	303	480
967	5	25	204	303	481
968	5	25	204	303	481
969	5	25	204	304	483
970	5	25	204	304	483
971	5	25	205	304	483
972	5	25	205	305	483
973	5	25	205	306	483
974	5	25	206	306	483
975	5	25	206	306	483
976	5	25	206	306	484
977	5	25	206	306	484
978	5	25	206	306	485
979	5	25	206	306	486
980	5	25	206	306	486
981	5	25	207	306	486
982	5	25	207	307	486
983	5	25	207	308	486
984	5	25	207	308	486
985	5	25	207	308	487
986	5	25	207	308	487
987	5	25	207	308	487
988	5	25	207	308	488
989	5	25	207	309	489
990	5	25	208	309	489
991	5	25	208	309	489
992	5	25	208	309	489
993	5	25	209	310	489
994	5	25	209	310	489
995	5	25	209	310	489
996	5	25	209	310	490
997	5	25	209	311	490
998	5	25	209	311	490
999	5	25	209	311	490
1000	5	25	209	311	490
1001	5	25	210	311	491
1002	5	25	210	311	491
1003	5	25	211	311	491
1004	5	25	212	311	491
1005	5	26	212	312	491
1006	5	26	212	312	491
1007	5	26	212	312	491
1008	5	26	213	312	491
1009	5	26	213	312	492
1010	5	26	213	312	492
1011	5	26	213	312	492
1012	5	26	213	312	492
1013	5	26	214	313	492
1014	5	26	214	313	492
1015	5	26	214	313	492
1016	5	26	214	313	492
1017	5	26	214	313	492
1018	5	26	214	313	494
1019	5	26	214	314	494
1020	5	26	214	314	495
1021	5	26	214	314	495
1022	5	26	214	314	496
1023	5	26	214	315	497
1024	5	26	214	316	497
1025	5	26	214	316	497
1026	5	26	214	316	497
1027	5	26	214	316	498
1028	5	26	214	316	498
1029	5	26	214	316	499
1030	5	26	214	316	500
1031	5	26	214	317	500
1032	5	26	214	317	502
1033	5	26	214	317	502
1034	5	26	215	317	504
1035	5	26	215	317	507
1036	5	26	215	317	507
1037	5	26	215	317	507
1038	5	26	215	317	508
1039	5	26	216	318	509
1040	5	26	217	319	509
1041	5	26	217	319	509
1042	5	26	217	319	509
1043	5	26	218	319	510
1044	5	26	219	320	510
1045	5	26	220	320	510
1046	5	26	220	320	510
1047	5	26	220	320	511
1048	5	26	220	320	513
1049	5	26	220	320	514
1050	5	26	220	320	515
1051	5	26	220	320	515
1052	5	26	221	321	515
1053	5	26	221	321	515
1054	5	26	221	321	515
1055	5	26	222	322	516
1056	5	26	222	323	517
1057	5	26	222	324	518
1058	5	26	223	324	520
1059	5	26	224	324	523
1060	5	26	224	324	524
1061	5	26	225	324	524
1062	5	26	225	324	524
1063	5	26	225	325	524
1064	5	27	225	326	524
1065	5	27	225	326	524
1066	5	27	226	327	524
1067	5	27	226	328	526
1068	5	27	226	328	527
1069	5	27	227	328	528
1070	5	27	227	329	528
1071	5	27	227	330	528
1072	5	27	227	331	529
1073	5	27	227	331	529
1074	5	27	228	332	530
1075	5	27	229	332	530
1076	5	27	230	332	530
1077	5	27	230	332	530
1078	5	27	230	334	530
1079	5	27	230	335	530
1080	5	27	230	336	530
1081	5	28	230	336	530
1082	5	28	230	336	530
1083	5	28	232	337	532
1084	5	28	232	337	532
1085	5	28	232	337	532
1086	5	28	232	338	532
1087	5	28	232	338	532
1088	5	28	232	338	532
1089	5	28	233	338	534
1090	5	28	233	339	534
1091	5	28	233	339	534
1092	5	28	233	339	536
1093	5	28	233	339	537
1094	5	28	233	339	538
1095	5	28	234	340	539
1096	5	28	234	340	539
1097	5	28	234	340	539
1098	5	28	234	340	539
1099	5	28	234	341	540
1100	5	28	234	341	541
1101	5	28	234	341	541
1102	5	29	235	341	541
1103	5	29	235	341	541
1104	5	29	235	341	541
1105	5	29	236	341	541
1106	5	29	236	341	541
1107	5	29	236	341	541
1108	5	29	236	341	541
1109	5	30	236	341	541
1110	5	30	237	341	541
1111	5	30	237	342	542
1112	5	30	238	342	542
1113	5	30	238	342	542
1114	5	30	238	342	542
1115	5	30	238	342	542
1116	5	30	238	343	542
1117	5	30	238	343	542
1118	5	30	239	343	542
1119	5	30	239	343	542
1120	5	30	239	343	542
1121	5	30	239	343	542
1122	5	30	239	343	542
1123	5	30	240	343	542
1124	5	30	240	343	543
1125	5	30	240	345	544
1126	5	30	240	345	545
1127	5	30	240	345	545
1128	5	30	240	345	545
1129	5	30	240	345	545
1130	5	30	240	345	545
1131	5	30	240	345	545
1132	5	30	240	345	545
1133	5	30	240	345	546
1134	5	30	240	345	546
1135	5	30	240	346	546
1136	5	30	240	347	546
1137	5	30	241	347	546
1138	5	30	242	348	546
1139	5	31	242	348	547
1140	5	31	242	348	547
1141	5	32	244	350	547
1142	5	32	245	350	547
1143	5	32	245	350	547
1144	5	32	245	350	548
1145	5	32	246	350	548
1146	5	32	246	350	548
1147	5	32	246	350	549
1148	5	32	247	350	549
1149	5	32	248	350	550
1150	5	32	248	350	550
1151	5	32	248	350	550
1152	5	32	250	350	550
1153	5	32	250	350	550
1154	5	32	250	350	550
1155	5	32	251	351	550
1156	5	32	251	351	552
1157	5	32	251	351	552
1158	5	32	251	351	552
1159	5	32	251	351	552
1160	5	32	251	351	554
1161	5	32	251	352	554
1162	5	32	251	352	554
1163	5	32	251	352	554
1164	5	32	251	352	555
1165	5	32	251	352	555
1166	5	32	252	352	556
1167	5	32	252	352	556
1168	5	32	252	352	558
1169	5	32	252	352	558
1170	5	32	253	353	559
1171	5	32	253	353	560
1172	5	32	253	353	561
1173	5	32	253	353	561
1174	5	32	253	353	562
1175	5	32	253	354	562
1176	5	32	253	355	562
1177	5	32	253	355	562
1178	5	32	253	355	563
1179	5	32	253	355	563
1180	5	32	253	355	563
1181	5	32	253	355	565
1182	5	32	253	356	565
1183	5	32	253	356	565
1184	5	32	253	357	565
1185	5	32	253	357	566
1186	5	32	254	357	567
1187	5	32	255	358	567
1188	5	32	255	359	567
1189	5	33	255	359	567
1190	5	33	255	360	567
1191	5	33	255	360	567
1192	5	33	256	360	567
1193	5	33	256	360	567
1194	5	33	256	360	567
1195	5	33	256	361	568
1196	5	33	256	361	568
1197	5	33	256	362	568
1198	5	33	256	363	568
1199	5	33	256	363	569
1200	5	33	256	363	570
1201	5	33	256	363	570
1202	5	33	256	363	570
1203	5	33	256	364	570
1204	5	33	256	364	570
1205	5	33	256	364	570
1206	5	33	256	364	572
1207	5	33	256	364	572
1208	5	33	256	364	572
1209	5	33	257	364	572
1210	5	33	257	364	572
1211	5	33	257	365	572
1212	5	33	257	365	573
1213	5	33	257	365	574
1214	5	33	258	365	574
1215	5	33	258	365	575
1216	5	33	259	366	576
1217	5	33	259	366	576
1218	5	33	259	366	576
1219	5	33	259	366	576
1220	5	33	259	367	576
1221	5	33	259	367	576
1222	5	33	259	367	577
1223	5	34	259	369	577
1224	5	34	259	370	577
1225	5	34	259	371	578
1226	5	35	259	371	579
1227	5	35	259	371	579
1228	5	35	259	372	579
1229	5	35	260	372	580
1230	5	35	260	373	581
1231	5	35	260	373	583
1232	5	35	260	374	584
1233	5	35	260	374	585
1234	5	35	260	374	585
1235	5	35	261	374	585
1236	5	35	263	374	585
1237	5	35	263	374	586
1238	5	35	263	374	586
1239	5	35	263	374	588
1240	5	35	264	375	588
1241	5	35	264	375	588
1242	5	35	264	377	590
1243	5	35	264	378	591
1244	5	35	264	379	591
1245	5	35	264	379	592
1246	5	35	264	379	592
1247	5	35	264	379	592
1248	5	35	264	381	592
1249	5	35	264	381	592
1250	5	35	264	383	592
1251	5	35	264	383	592
1252	5	35	265	383	593
1253	5	35	265	383	594
1254	5	35	265	383	594
1255	5	35	265	383	595
1256	5	35	266	383	596
1257	5	35	266	383	596
1258	5	35	266	383	598
1259	5	35	266	383	598
1260	5	35	266	383	598
1261	5	35	266	383	599
1262	5	35	266	383	599
1263	5	35	267	384	599
1264	5	35	267	385	600
1265	5	35	267	387	600
1266	5	35	267	387	600
1267	5	35	267	388	601
1268	5	35	267	388	602
1269	5	35	267	389	602
1270	5	35	267	389	602
1271	5	35	269	389	602
1272	5	35	269	389	602
1273	5	35	269	390	602
1274	5	35	269	390	602
1275	5	35	269	390	602
1276	5	35	269	391	603
1277	5	35	269	391	603
1278	5	35	269	391	603
1279	5	35	269	391	604
1280	5	35	269	392	605
1281	5	35	270	393	605
1282	5	35	270	393	605
1283	5	35	270	393	605
1284	5	35	270	393	605
1285	5	35	271	393	605
1286	5	35	271	393	605
1287	5	35	271	393	606
1288	5	35	271	393	606
1289	5	35	271	393	606
1290	5	35	271	393	606
1291	5	35	271	393	606
1292	5	35	271	393	606
1293	5	35	271	393	606
1294	5	35	272	394	606
1295	5	35	272	394	609
1296	5	35	272	394	611
1297	5	35	272	394	611
1298	5	35	272	395	611
1299	5	35	272	395	611
1300	5	35	272	396	611
1301	5	35	272	396	611
1302	5	35	272	396	611
1303	5	35	272	396	611
1304	5	35	272	396	611
1305	5	35	272	396	611
1306	5	35	272	396	611
1307	5	35	272	397	612
1308	5	35	272	397	612
1309	5	35	272	398	614
1310	5	35	272	400	615
1311	5	35	272	402	615
1312	5	35	272	402	616
1313	5	35	273	403	616
1314	5	35	273	404	616
1315	5	35	273	405	616
1316	5	35	273	405	616
1317	5	35	273	405	617
1318	5	35	273	407	617
1319	5	35	273	407	617
1320	5	35	273	408	617
1321	5	35	273	408	617
1322	5	35	273	408	617
1323	5	35	273	408	618
1324	5	35	273	408	618
1325	5	35	273	408	618
1326	5	35	274	408	618
1327	5	35	274	408	618
1328	5	35	274	408	618
1329	5	35	275	408	618
1330	5	35	275	410	618
1331	5	35	275	410	618
1332	5	35	275	410	618
1333	5	35	275	410	618
1334	5	35	276	410	618
1335	5	35	276	410	618
1336	5	35	276	411	619
1337	5	35	276	412	619
1338	5	35	276	413	619
1339	5	35	277	413	619
1340	5	35	278	413	619
1341	5	35	278	413	619
1342	5	35	278	413	619
1343	5	35	278	413	619
1344	5	35	278	413	620
1345	5	35	279	413	620
1346	5	35	279	414	620
1347	5	35	279	414	621
1348	5	35	280	414	622
1349	5	35	280	415	622
1350	5	35	280	415	622
1351	5	35	280	415	622
1352	5	35	280	415	623
1353	5	35	283	415	624
1354	5	35	283	415	624
1355	5	35	283	415	624
1356	5	35	283	417	625
1357	5	35	283	418	626
1358	5	35	283	418	626
1359	5	35	283	418	626
1360	5	35	283	418	626
1361	5	35	283	418	626
1362	5	35	283	418	628
1363	5	35	284	419	628
1364	5	35	284	419	629
1365	5	35	284	419	629
1366	5	35	284	419	629
1367	5	35	284	419	629
1368	5	35	285	419	629
1369	5	35	285	420	629
1370	5	35	285	420	629
1371	5	35	285	420	629
1372	5	35	286	420	629
1373	5	35	287	420	629
1374	5	35	287	420	629
1375	5	35	288	420	629
1376	5	35	288	420	629
1377	5	35	289	420	629
1378	5	35	289	421	629
1379	5	35	290	421	629
1380	5	35	290	421	629
1381	5	35	291	421	630
1382	5	35	293	421	631
1383	5	35	293	421	631
1384	5	35	293	421	631
1385	5	35	294	421	632
1386	5	35	294	422	632
1387	5	35	294	422	633
1388	5	35	295	422	634
1389	5	35	295	422	635
1390	5	35	295	423	636
1391	5	35	295	423	636
1392	5	35	295	423	636
1393	5	35	295	423	636
1394	5	35	295	423	636
1395	5	35	295	423	636
1396	5	35	295	423	636
1397	5	35	295	423	636
1398	5	35	295	423	636
1399	5	35	296	423	636
1400	5	35	296	423	636
1401	5	35	296	423	637
1402	5	35	296	423	637
1403	5	35	296	423	637
1404	5	35	296	423	637
1405	5	35	296	423	637
1406	5	35	296	423	637
1407	5	35	296	423	637
1408	5	35	297	423	637
1409	5	35	297	424	638
1410	5	35	297	424	640
1411	5	35	298	426	641
1412	5	35	298	426	641
1413	5	35	298	426	641
1414	5	35	299	426	641
1415	5	35	299	426	642
1416	5	35	299	427	642
1417	5	35	299	427	643
1418	5	35	299	427	644
1419	5	35	300	427	644
1420	5	35	300	427	644
1421	5	35	300	427	645
1422	5	35	300	430	646
1423	5	35	300	430	646
1424	5	35	300	430	647
1425	5	35	300	432	648
1426	5	35	300	433	648
1427	5	35	300	433	648
1428	5	35	300	433	648
1429	5	35	300	433	648
1430	5	35	300	433	648
1431	5	35	300	433	648
1432	5	35	300	433	648
1433	5	35	301	433	649
1434	5	35	302	433	649
1435	5	35	302	433	649
1436	5	35	302	434	649
1437	5	35	302	434	649
1438	5	35	303	434	651
1439	5	35	303	434	651
1440	5	35	304	434	651
1441	5	35	304	434	651
1442	5	35	304	434	651
1443	5	35	304	435	651
1444	5	35	304	435	651
1445	5	35	305	435	653
1446	5	35	305	435	653
1447	5	35	305	436	653
1448	5	35	305	436	653
1449	5	35	305	436	653
1450	5	35	307	436	653
1451	5	35	307	436	653
1452	5	35	308	436	653
1453	5	35	308	436	654
1454	5	36	308	436	655
1455	5	36	308	436	656
1456	5	36	308	436	656
1457	5	36	308	437	656
1458	5	36	308	437	656
1459	5	36	308	437	656
1460	5	37	308	437	657
1461	5	37	309	437	657
1462	5	37	309	438	660
1463	5	37	309	438	660
1464	5	37	309	439	661
1465	5	37	310	439	661
1466	5	37	310	439	661
1467	5	37	312	439	661
1468	5	37	312	439	661
1469	5	37	312	439	662
1470	5	37	313	441	662
1471	5	37	313	441	662
1472	5	37	313	441	662
1473	5	37	313	441	662
1474	5	37	313	442	662
1475	5	37	313	443	662
1476	5	37	313	444	662
1477	5	37	313	444	663
1478	5	37	313	444	663
1479	5	37	313	444	663
1480	5	37	313	444	663
1481	5	37	313	444	663
1482	5	37	313	444	663
1483	5	37	313	444	663
1484	5	37	313	444	664
1485	5	37	313	444	665
1486	5	37	313	444	665
1487	5	37	313	444	665
1488	5	37	313	445	665
1489	5	37	314	446	665
1490	5	37	314	446	666
1491	5	37	314	446	666
1492	5	37	314	446	666
1493	5	37	314	447	666
1494	5	37	314	447	668
1495	5	37	314	447	668
1496	5	37	314	447	668
1497	5	37	314	447	669
1498	5	37	314	447	669
1499	5	37	314	447	669
1500	5	37	315	448	669
1501	5	37	315	448	669
1502	5	37	316	448	669
1503	5	37	316	449	669
1504	5	37	316	449	669
1505	5	37	316	450	669
1506	5	37	316	451	670
1507	5	37	316	451	670
1508	5	37	316	451	670
1509	5	37	316	451	672
1510	5	37	316	451	672
1511	5	37	316	451	672
1512	5	37	316	451	672
1513	5	37	316	451	672
1514	5	37	316	451	672
1515	5	37	316	451	672
1516	5	37	316	451	672
1517	5	37	317	451	672
1518	5	37	317	452	673
1519	5	37	317	453	673
1520	5	37	317	453	673
1521	5	37	317	453	673
1522	5	37	317	453	673
1523	5	37	317	453	674
1524	5	37	318	454	676
1525	5	37	318	455	676
1526	5	37	318	456	676
1527	5	37	318	456	676
1528	5	37	318	456	677
1529	5	37	318	456	677
1530	5	37	318	456	678
1531	5	37	318	456	678
1532	5	37	318	456	678
1533	5	37	318	456	679
1534	5	37	318	456	680
1535	5	37	318	456	680
1536	5	37	318	456	680
1537	5	37	318	457	680
1538	5	37	318	457	681
1539	5	37	320	457	682
1540	5	37	320	457	682
1541	5	37	320	457	683
1542	5	37	320	457	684
1543	5	37	321	457	684
1544	5	37	322	457	684
1545	5	37	322	458	684
1546	5	37	322	458	684
1547	5	37	322	458	684
1548	5	37	322	458	684
1549	5	37	322	459	686
1550	5	37	322	459	686
1551	5	37	322	459	687
1552	5	37	322	460	687
1553	5	37	322	460	687
1554	5	37	322	460	687
1555	5	37	322	460	687
1556	5	37	322	460	688
1557	5	37	322	460	688
1558	5	37	322	460	689
1559	5	37	322	460	689
1560	5	37	322	460	689
1561	5	37	322	460	691
1562	5	37	322	460	691
1563	5	37	322	460	691
1564	5	37	322	461	691
1565	5	37	322	461	692
1566	5	37	322	461	693
1567	5	37	322	461	693
1568	5	37	322	461	693
1569	5	37	322	461	693
1570	5	37	322	461	693
1571	5	37	322	461	693
1572	5	37	322	461	694
1573	5	37	322	462	694
1574	5	37	322	462	694
1575	5	37	322	462	694
1576	5	37	323	462	694
1577	5	37	324	462	694
1578	5	37	324	462	695
1579	5	37	324	462	695
1580	5	37	324	462	696
1581	5	37	324	462	696
1582	5	37	324	462	696
1583	5	37	324	462	696
1584	5	37	324	462	697
1585	5	37	324	462	697
1586	5	37	324	462	697
1587	5	37	324	463	697
1588	5	37	324	463	697
1589	5	37	324	463	698
1590	5	37	324	463	698
1591	5	37	325	463	699
1592	5	37	325	463	699
1593	5	37	325	463	699
1594	5	37	325	463	699
1595	5	37	325	464	699
1596	5	37	326	464	699
1597	5	37	326	464	699
1598	5	37	327	464	700
1599	5	37	327	464	700
1600	5	37	327	464	700
1601	5	37	328	464	700
1602	5	37	328	464	701
1603	5	37	328	464	701
1604	5	37	328	464	701
1605	5	37	328	464	703
1606	5	37	328	464	704
1607	5	37	328	464	704
1608	5	37	328	464	704
1609	5	37	328	464	704
1610	5	37	328	465	705
1611	5	37	328	465	705
1612	5	37	328	466	705
1613	5	37	328	466	705
1614	5	37	328	466	705
1615	5	37	328	467	705
1616	5	37	329	467	705
1617	5	37	329	467	706
1618	5	37	329	467	707
1619	5	37	329	467	707
1620	5	37	331	467	708
1621	5	37	332	467	708
1622	5	37	332	467	709
1623	5	37	333	467	709
1624	5	37	333	467	709
1625	5	37	333	468	709
1626	5	37	333	468	709
1627	5	37	333	468	710
1628	5	37	333	468	710
1629	5	37	333	468	710
1630	5	37	333	468	712
1631	5	37	334	469	712
1632	5	37	334	469	712
1633	5	37	334	469	712
1634	5	37	334	469	713
1635	5	37	334	469	713
1636	5	37	334	469	713
1637	5	37	334	469	713
1638	5	37	334	469	713
1639	5	37	334	469	713
1640	5	37	334	469	713
1641	5	37	334	469	714
1642	5	37	334	470	715
1643	5	37	334	470	716
1644	5	37	334	471	716
1645	5	37	334	472	717
1646	5	37	335	472	717
1647	5	37	335	473	718
1648	5	37	335	473	718
1649	5	37	335	473	718
1650	5	37	336	474	719
1651	5	37	337	474	719
1652	5	37	337	475	720
1653	5	37	337	475	722
1654	5	37	338	475	722
1655	5	37	338	475	722
1656	5	37	339	475	722
1657	5	37	339	475	722
1658	5	37	339	476	724
1659	5	37	339	476	724
1660	5	37	339	476	724
1661	5	38	339	476	724
1662	5	38	339	476	724
1663	5	38	339	476	724
1664	5	38	339	476	726
1665	5	38	339	476	727
1666	5	39	339	476	727
1667	5	39	339	476	727
1668	5	39	339	476	728
1669	5	39	339	478	729
1670	5	39	339	478	729
1671	5	39	339	478	729
1672	5	39	339	478	729
1673	5	39	339	478	730
1674	5	39	340	478	730
1675	5	39	340	478	730
1676	5	39	341	478	730
1677	5	39	341	478	731
1678	5	39	341	478	731
1679	5	39	341	478	731
1680	5	39	341	478	731
1681	5	39	341	478	732
1682	5	39	341	478	733
1683	5	39	341	478	733
1684	5	39	341	478	733
1685	5	39	341	478	733
1686	5	39	341	479	734
1687	5	39	341	479	734
1688	5	39	341	480	734
1689	5	39	341	480	734
1690	5	39	342	480	734
1691	5	39	343	480	734
1692	5	39	343	481	734
1693	5	39	343	481	735
1694	5	39	343	481	735
1695	5	39	343	481	736
1696	5	39	343	482	736
1697	5	39	344	482	737
1698	5	39	345	482	737
1699	5	39	346	483	737
1700	5	39	346	483	737
1701	5	39	346	483	737
1702	5	39	346	483	737
1703	5	39	346	483	737
1704	5	39	346	483	737
1705	5	39	346	483	737
1706	5	39	346	483	738
1707	5	39	347	483	738
1708	5	39	347	484	739
1709	5	39	347	484	739
1710	5	39	347	484	739
1711	5	39	347	484	739
1712	5	39	347	484	739
1713	5	39	347	484	739
1714	5	39	349	485	739
1715	5	39	349	485	741
1716	5	39	349	485	741
1717	5	39	349	486	741
1718	5	39	350	486	741
1719	5	39	350	486	741
1720	5	39	350	486	741
1721	5	39	350	488	743
1722	5	39	350	488	745
1723	5	39	350	488	745
1724	5	39	350	488	745
1725	5	39	350	488	745
1726	5	39	351	488	745
1727	5	39	351	488	745
1728	5	39	351	489	745
1729	5	39	352	490	745
1730	5	39	352	490	746
1731	5	39	352	490	747
1732	5	39	352	490	747
1733	5	39	352	490	747
1734	5	39	352	490	748
1735	5	39	352	491	748
1736	5	39	352	491	750
1737	5	39	352	491	750
1738	5	39	352	491	750
1739	5	39	353	491	750
1740	5	39	353	491	750
1741	5	39	353	492	750
1742	5	39	353	492	750
1743	5	39	354	492	750
1744	5	39	354	493	751
1745	5	39	354	493	751
1746	5	39	354	494	751
1747	5	39	354	494	751
1748	5	39	354	495	751
1749	5	39	354	495	751
1750	5	39	354	495	751
1751	5	39	354	495	751
1752	5	39	355	495	751
1753	5	40	355	496	751
1754	5	40	355	496	751
1755	5	40	355	496	751
1756	5	40	355	496	752
1757	5	40	355	496	752
1758	5	40	355	496	752
1759	5	40	356	496	752
1760	5	40	356	496	753
1761	5	40	356	496	753
1762	5	40	356	497	754
1763	5	40	358	497	754
1764	5	40	358	498	754
1765	5	40	359	500	754
1766	5	40	359	500	754
1767	5	40	359	500	755
1768	5	40	359	500	755
1769	5	40	359	500	755
1770	5	40	359	500	755
1771	5	40	360	500	755
1772	5	40	360	500	755
1773	5	40	360	500	755
1774	5	40	360	500	757
1775	5	40	361	500	758
1776	5	40	362	501	758
1777	5	40	362	501	758
1778	5	40	362	501	758
1779	5	40	362	502	758
1780	5	40	362	502	759
1781	5	40	362	502	762
1782	5	40	362	502	762
1783	5	40	362	502	762
1784	5	40	362	503	762
1785	5	40	363	503	762
1786	5	40	363	503	762
1787	5	40	364	503	762
1788	5	40	364	503	762
1789	5	40	364	504	762
1790	5	40	364	504	762
1791	5	40	364	504	762
1792	5	40	364	505	762
1793	5	40	364	505	762
1794	5	40	364	505	763
1795	5	40	365	505	763
1796	5	40	365	506	764
1797	5	40	365	506	764
1798	5	40	366	506	765
1799	5	40	366	506	765
1800	5	40	366	506	767
1801	5	40	366	506	767
1802	5	40	366	506	767
1803	5	40	366	506	767
1804	5	40	366	506	768
1805	5	40	366	506	768
1806	5	40	367	506	768
1807	5	40	367	506	768
1808	5	40	368	506	768
1809	5	40	368	506	768
1810	5	40	368	506	768
1811	5	40	368	506	768
1812	5	40	368	506	768
1813	5	40	368	506	769
1814	5	40	368	506	769
1815	5	40	368	506	769
1816	5	40	368	506	769
1817	5	40	368	507	769
1818	5	40	368	507	769
1819	5	40	368	507	769
1820	5	40	368	507	769
1821	5	40	368	507	769
1822	5	40	368	508	769
1823	5	40	369	508	769
1824	5	40	370	508	770
1825	5	40	370	508	770
1826	5	40	370	508	770
1827	5	40	370	508	770
1828	5	40	371	508	771
1829	5	40	372	508	771
1830	5	40	372	509	772
1831	5	40	372	509	774
1832	5	40	372	509	774
1833	5	40	372	509	774
1834	5	40	372	510	774
1835	5	40	372	510	774
1836	5	40	372	510	775
1837	5	40	372	510	775
1838	5	40	373	510	775
1839	5	40	373	510	776
1840	5	40	373	510	777
1841	5	40	374	511	777
1842	5	40	374	511	777
1843	5	40	374	511	777
1844	5	40	374	511	777
1845	5	40	374	511	777
1846	5	40	374	511	777
1847	5	40	374	511	777
1848	5	40	374	512	777
1849	5	40	374	512	777
1850	5	40	374	512	778
1851	5	40	375	512	778
1852	5	40	375	512	778
1853	5	40	375	513	778
1854	5	40	375	513	779
1855	5	40	375	513	780
1856	5	40	376	513	780
1857	5	40	377	513	780
1858	5	40	377	513	781
1859	5	40	377	513	781
1860	5	40	378	513	781
1861	5	40	379	513	781
1862	5	40	379	513	781
1863	5	40	379	513	781
1864	5	40	379	514	781
1865	5	40	379	514	781
1866	5	40	380	514	781
1867	5	40	380	515	781
1868	5	40	380	515	781
1869	5	40	380	515	781
1870	5	40	380	517	781
1871	5	40	380	518	781
1872	5	40	381	518	782
1873	5	40	381	518	782
1874	5	40	382	519	782
1875	5	40	382	519	784
1876	5	40	384	519	784
1877	5	40	384	519	785
1878	5	40	385	519	785
1879	5	40	385	519	785
1880	5	40	385	519	785
1881	5	40	386	519	785
1882	5	40	386	519	785
1883	5	40	386	519	785
1884	5	40	386	519	786
1885	5	40	386	519	787
1886	5	40	386	519	790
1887	5	40	386	519	790
1888	5	40	386	519	792
1889	5	40	386	519	792
1890	5	40	386	519	792
1891	5	40	386	519	792
1892	5	40	387	519	792
1893	5	40	387	519	792
1894	5	40	387	519	792
1895	5	40	387	519	792
1896	5	40	387	519	792
1897	5	40	388	520	793
1898	5	40	388	520	793
1899	5	40	388	520	793
1900	5	40	388	520	793
1901	5	40	388	520	794
1902	5	40	388	520	795
1903	5	40	388	520	795
1904	5	40	388	521	795
1905	5	40	388	521	796
1906	5	40	388	522	796
1907	5	40	388	522	796
1908	5	40	388	522	796
1909	5	40	388	523	796
1910	5	40	388	523	797
1911	5	40	388	523	798
1912	5	40	388	523	798
1913	5	40	388	523	798
1914	5	40	388	524	798
1915	5	40	389	524	798
1916	5	40	389	524	798
1917	5	40	389	524	798
1918	5	40	389	524	799
1919	5	40	389	524	800
1920	5	40	389	524	800
1921	5	40	389	524	801
1922	5	40	390	524	803
1923	5	40	390	524	803
1924	5	40	390	524	803
1925	5	40	390	524	803
1926	5	40	390	524	803
1927	5	40	390	525	803
1928	5	40	390	525	803
1929	5	40	391	525	803
1930	5	40	391	525	803
1931	5	40	392	525	804
1932	5	40	392	525	804
1933	5	40	393	525	804
1934	5	40	393	525	804
1935	5	40	393	527	804
1936	5	40	393	527	804
1937	5	40	394	527	805
1938	5	40	394	527	805
1939	5	40	394	527	805
1940	5	40	394	527	805
1941	5	40	394	527	805
1942	5	40	395	527	805
1943	5	40	395	527	805
1944	5	40	395	527	805
1945	5	40	396	527	805
1946	5	40	397	527	806
1947	5	40	397	527	806
1948	5	40	398	527	807
1949	5	40	398	528	807
1950	5	40	398	528	807
1951	5	40	398	528	807
1952	5	40	398	529	808
1953	5	40	399	529	809
1954	5	40	399	529	809
1955	5	40	399	530	809
1956	5	40	400	530	809
1957	5	40	400	530	809
1958	5	40	400	530	809
1959	5	40	400	530	809
1960	5	40	400	530	809
1961	5	40	400	530	809
1962	5	40	402	530	809
1963	5	40	402	530	809
1964	5	40	402	531	811
1965	5	40	402	531	811
1966	5	40	403	532	811
1967	5	40	403	532	811
1968	5	40	403	532	811
1969	5	40	403	532	811
1970	5	40	403	532	812
1971	5	40	403	532	812
1972	5	40	404	532	813
1973	5	40	404	533	813
1974	5	40	404	535	813
1975	5	40	404	535	814
1976	5	40	404	535	814
1977	5	40	404	535	814
1978	5	40	404	535	814
1979	5	40	404	535	814
1980	5	40	404	537	815
1981	5	40	404	537	816
1982	5	40	404	537	816
1983	5	40	404	537	816
1984	5	40	404	537	816
1985	5	40	404	538	817
1986	5	40	404	538	817
1987	5	40	404	538	818
1988	5	40	404	538	818
1989	5	40	404	538	818
1990	5	40	404	538	818
1991	5	40	404	538	818
1992	5	40	404	538	818
1993	5	40	404	538	818
1994	5	40	405	538	818
1995	5	40	405	538	819
1996	5	40	405	538	819
1997	5	40	405	538	819
1998	5	40	405	538	819
[truncated: 3,002 more rows]
